# Supplementary material for: Comparative MS- and NMR-Based Metabolome Mapping of Egyptian Red and White Squill Bulbs F. Liliaceae and in Relation to Their Cytotoxic Effect
Source: MDPI journal article supplement (doi:10.3390/plants12112078), 2023-05-23
Supplement: s1 [file s1]

**Table S1.**  $^1\text{H}$ -NMR quantification of most primary and secondary metabolites detected in *Urginea* species; white squill (WS) and red squill (RS). Values are expressed as  $\mu\text{g}/\text{mg}$  dry powder  $\pm$  S.D (n = 3). Chemical shifts used for metabolite quantification were determined in methanol- $\text{d}_6$  and expressed as relative values to HMDS (0.94 mM final concentration).

| compound                    | Protons used in quantification | WS                  | RS                  |
|-----------------------------|--------------------------------|---------------------|---------------------|
| $\omega$ -9 fatty acid (M1) | H-3 $\text{CH}_2$              | 57.52 $\pm$ 25.342  | 1.2437 $\pm$ 0.525  |
| $\omega$ -6 fatty acid (M2) | bis-allylic $\text{CH}_2$      | 32.1697 $\pm$ 13.82 | 1.6003 $\pm$ 0.0177 |
| $\omega$ -3 fatty acid (M3) |                                |                     |                     |
| Rhamnose (M4)               | H-6 $\text{CH}_3$              | 10.4557 $\pm$ 1.119 | 11.39 $\pm$ 0.285   |
| $\beta$ -glucose (M5)       | H-1                            | 15.0467 $\pm$ 0.602 | 8.2347 $\pm$ 0.721  |
| $\alpha$ -glucose (M6)      | H-1                            | 15.5767 $\pm$ 1.19  | 8.767 $\pm$ 0.474   |
| Sucrose (M7)                | H-1                            | 1.4733 $\pm$ 0.463  | 8.2263 $\pm$ 0.43   |
| alanine (M8)                | H-3                            | 8.5873 $\pm$ 1.631  | 0.3513 $\pm$ 0.133  |
| aspartic acid (M9)          | H-1                            | 43.07 $\pm$ 7.217   | 38.3367 $\pm$ 4.943 |
| glycine (M10)               | H-2                            | 19.79 $\pm$ 3.534   | 7.1673 $\pm$ 1.032  |
| Tyrosine (M11)              | H-6                            | 3.964 $\pm$ 0.66    | -                   |
| Tryptophan (M12)            | H-10                           | 2.2853 $\pm$ 0.18   | 1.0087 $\pm$ 0.115  |
| bufalin (M13)               | H-22                           | 17.4867 $\pm$ 7.502 | -                   |
| Scilliradin (M14)           |                                |                     |                     |
| dihydro kaempferol (M15)    | H-6'                           |                     | 43.61 $\pm$ 2.318   |
| Coumarin (M16)              | H-4                            | 5.9703 $\pm$ 0.282  | 4.6927 $\pm$ 0.282  |

**Table S2.** RS and WS extract inhibition and viability values in different concentrations against different cancer cell lines measured by SRB assay.

| Conc. |           | RS (MCF7)   |           |            |           |            |             | WS (MCF7)   |            |           |            |           |            |             |
|-------|-----------|-------------|-----------|------------|-----------|------------|-------------|-------------|------------|-----------|------------|-----------|------------|-------------|
| µg/mL | Viability | Inhibition  | Viability | Inhibition | Viability | Inhibition | MEAN±SD     | Viability   | Inhibition | Viability | Inhibition | Viability | Inhibition | MEAN±SD     |
| 0     | 100       | 0           | 100       | 0          | 100       | 0          |             | 100         | 0          | 100       | 0          | 100       | 0          |             |
| 0.01  | 99.291    | 0.709       | 97.48     | 2.52       | 101.1     | -1.1       |             | 99.917      | 0.083      | 100       | 0          | 99.752    | 0.248      |             |
| 0.1   | 74.567    | 25.433      | 74.409    | 25.591     | 74.488    | 25.512     |             | 99.089      | 0.911      | 100.5     | -0.5       | 99.917    | 0.083      |             |
| 1     | 24.882    | 75.118      | 25.433    | 74.567     | 26.063    | 73.937     |             | 25.828      | 74.172     | 26.325    | 73.675     | 25.414    | 74.586     |             |
| 10    | 22.52     | 77.48       | 22.598    | 77.402     | 22.52     | 77.48      |             | 22.185      | 77.815     | 22.599    | 77.401     | 22.351    | 77.649     |             |
| 100   | 17.48     | 82.52       | 17.323    | 82.677     | 17.008    | 82.992     |             | 14.983      | 85.017     | 16.06     | 83.94      | 16.887    | 83.113     |             |
| IC50  |           | 0.1636      |           | 0.1734     |           | 0.1593     | 0.165±0.007 |             | 0.326      |           | 0.3309     |           | 0.32       | 0.326±0.005 |
| Conc. |           | RS (A-549)  |           |            |           |            |             | WS (A-549)  |            |           |            |           |            |             |
| µg/mL | Viability | Inhibition  | Viability | Inhibition | Viability | Inhibition | MEAN±SD     | Viability   | Inhibition | Viability | Inhibition | Viability | Inhibition | MEAN±SD     |
| 0     | 100       | 0           | 100       | 0          | 100       | 0          |             | 100         | 0          | 100       | 0          | 100       | 0          |             |
| 0.01  | 92.965    | 7.035       | 94.831    | 5.169      | 91.098    | 8.902      |             | 94.79       | 5.21       | 94.588    | 5.412      | 94.992    | 5.008      |             |
| 0.1   | 84.35     | 15.65       | 84.853    | 15.147     | 83.202    | 16.798     |             | 55.446      | 44.554     | 56.726    | 43.274     | 55.985    | 44.015     |             |
| 1     | 9.9067    | 90.0933     | 10.122    | 89.878     | 9.6195    | 90.3805    |             | 2.8296      | 97.1704    | 2.2906    | 97.7094    | 3.3685    | 96.6315    |             |
| 10    | 3.1587    | 96.8413     | 3.8765    | 96.1235    | 2.4408    | 97.5592    |             | 2.9643      | 97.0357    | 2.0885    | 97.9115    | 2.2232    | 97.7768    |             |
| 100   | 3.8047    | 96.1953     | 3.6612    | 96.3388    | 3.9483    | 96.0517    |             | 1.0779      | 98.9221    | 1.2127    | 98.7873    | 1.4148    | 98.5852    |             |
| IC50  |           | 0.2727      |           | 0.2661     |           | 0.2756     | 0.271±0.005 |             | 0.1053     |           | 0.1115     |           | 0.1079     | 0.108±0.003 |
| Conc. |           | RS (SKOV-3) |           |            |           |            |             | WS (SKOV-3) |            |           |            |           |            |             |
| µg/mL | Viability | Inhibition  | Viability | Inhibition | Viability | Inhibition | MEAN±SD     | Viability   | Inhibition | Viability | Inhibition | Viability | Inhibition | MEAN±SD     |
| 0     | 100       | 0           | 100       | 0          | 100       | 0          |             | 100         | 0          | 100       | 0          | 100       | 0          |             |
| 0.01  | 92.074    | 7.926       | 90.415    | 9.585      | 89.585    | 10.415     |             | 81.267      | 18.733     | 79.89     | 20.11      | 84.022    | 15.978     |             |
| 0.1   | 81.843    | 18.157      | 87.926    | 12.074     | 84.885    | 15.115     |             | 79.89       | 20.11      | 78.237    | 21.763     | 82.369    | 17.631     |             |
| 1     | 45.069    | 54.931      | 43.963    | 56.037     | 44.516    | 55.484     |             | 33.196      | 66.804     | 31.956    | 68.044     | 34.435    | 65.565     |             |
| 10    | 7.4654    | 92.5346     | 7.1889    | 92.8111    | 6.9124    | 93.0876    |             | 3.0303      | 96.9697    | 4.4077    | 95.5923    | 4.6832    | 95.3168    |             |
| 100   | 2.4885    | 97.5115     | 2.765     | 97.235     | 2.4885    | 97.5115    |             | 1.1019      | 98.8981    | 1.6529    | 98.3471    | 1.6529    | 98.3471    |             |
| IC50  |           | 0.9077      |           | 0.8932     |           | 0.9357     | 0.912±0.021 |             | 0.7059     |           | 0.6708     |           | 0.6955     | 0.690±0.018 |

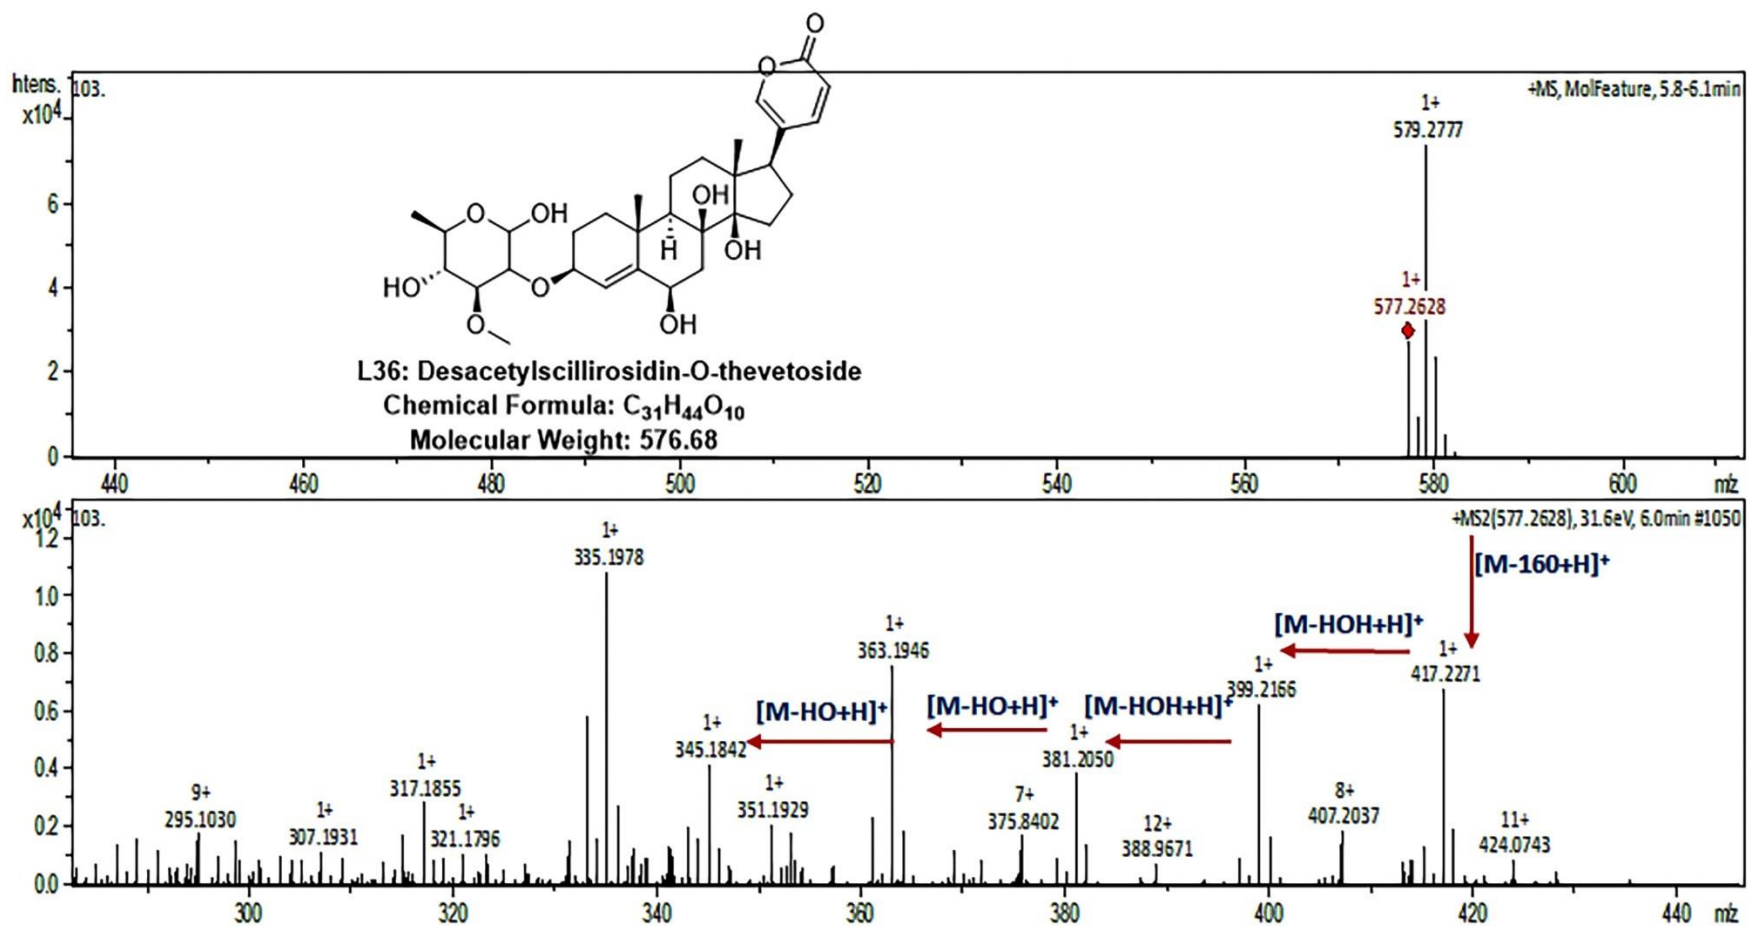

**Figure S1.-A:** ESI-MS/MS spectrum of L36 in the positive ion mode.

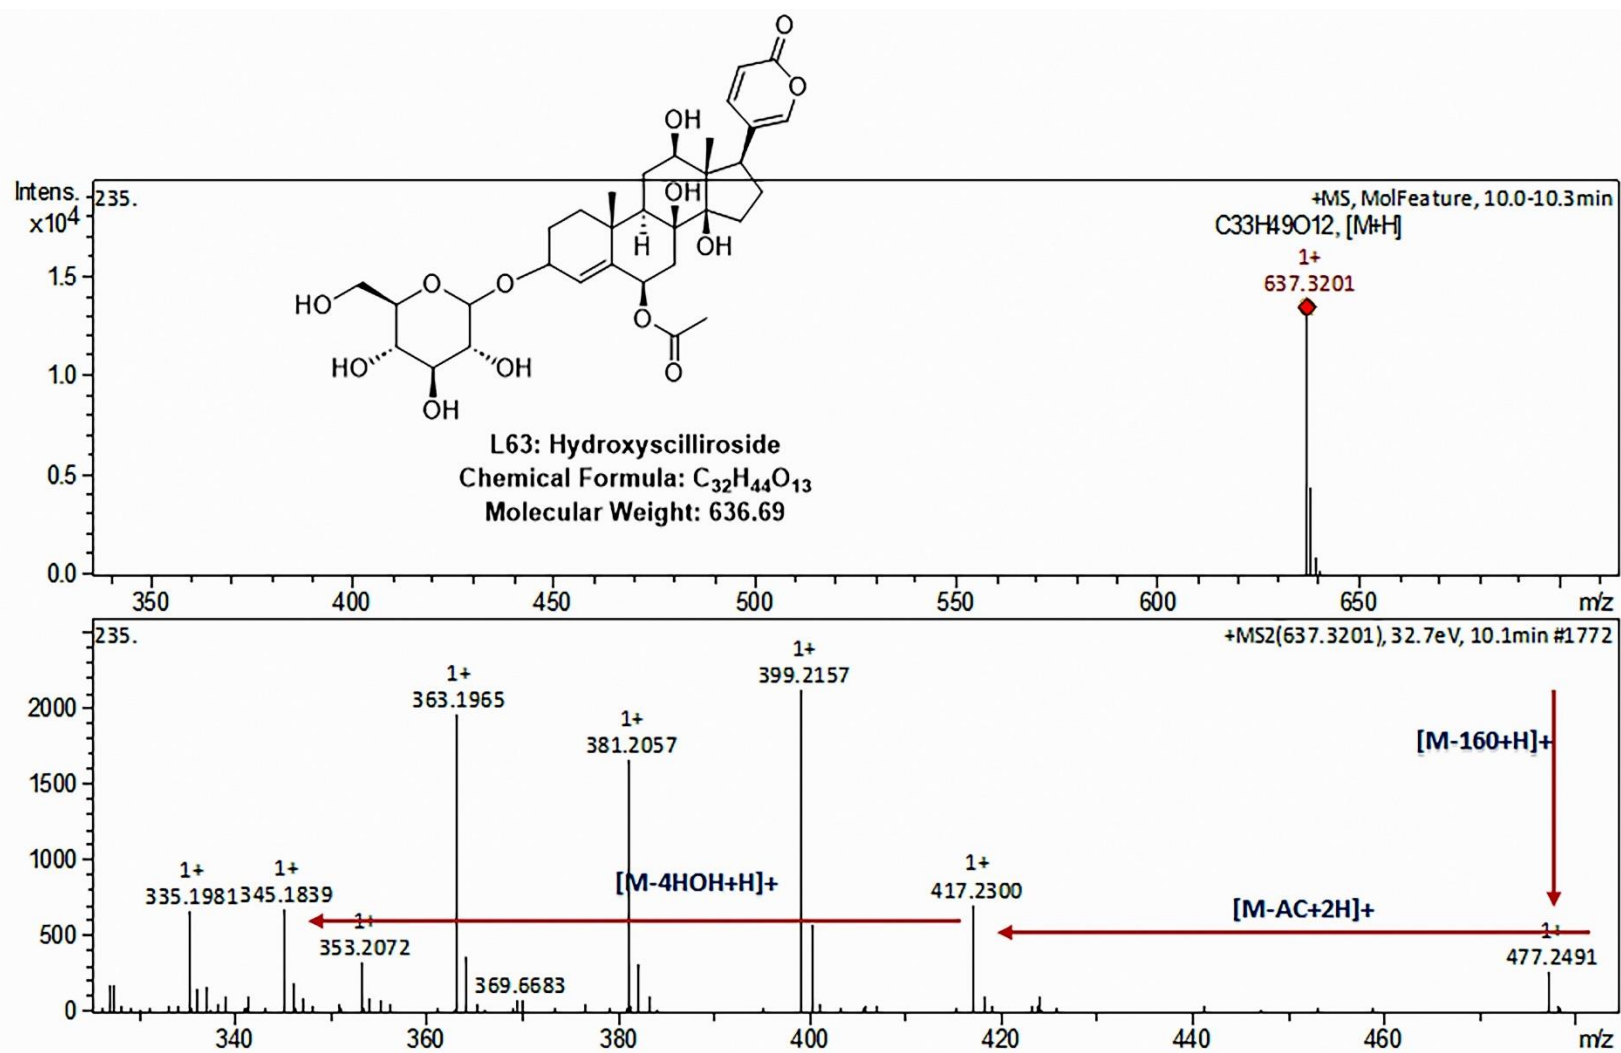

**Figure S1.-B:** ESI-MS/MS spectrum of L63 in the positive ion mode.

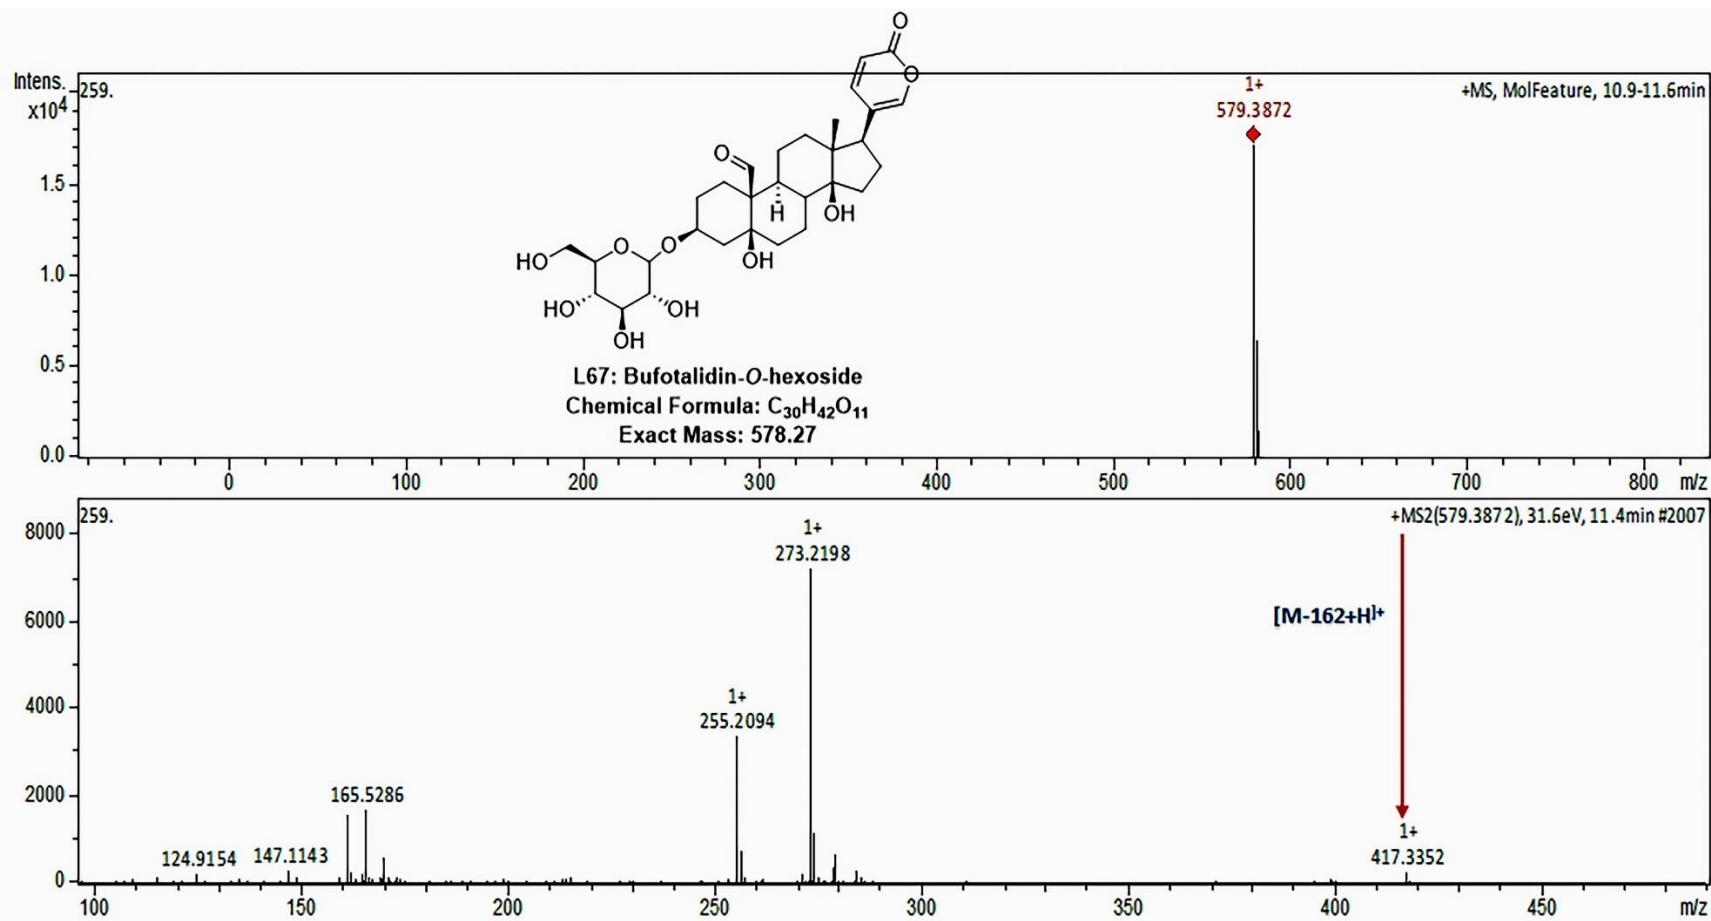

**Figure S1.-C:** ESI-MS/MS spectrum of L67 in the positive ion mode.

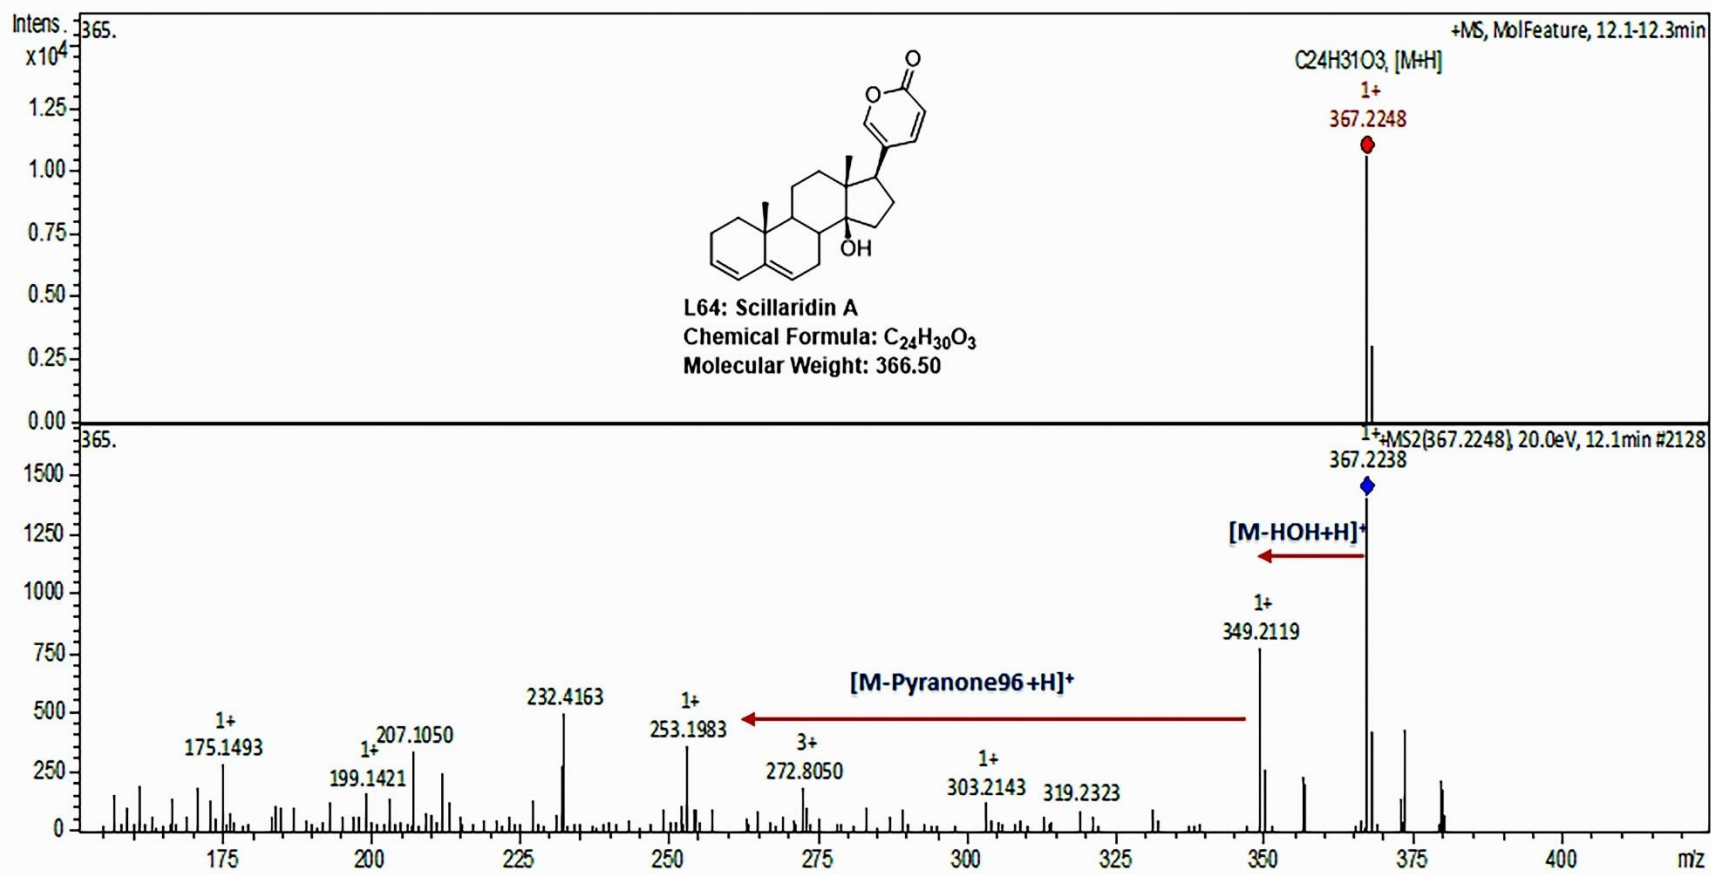

**Figure S1.-D:** ESI-MS/MS spectrum of L64 in the positive ion mode.

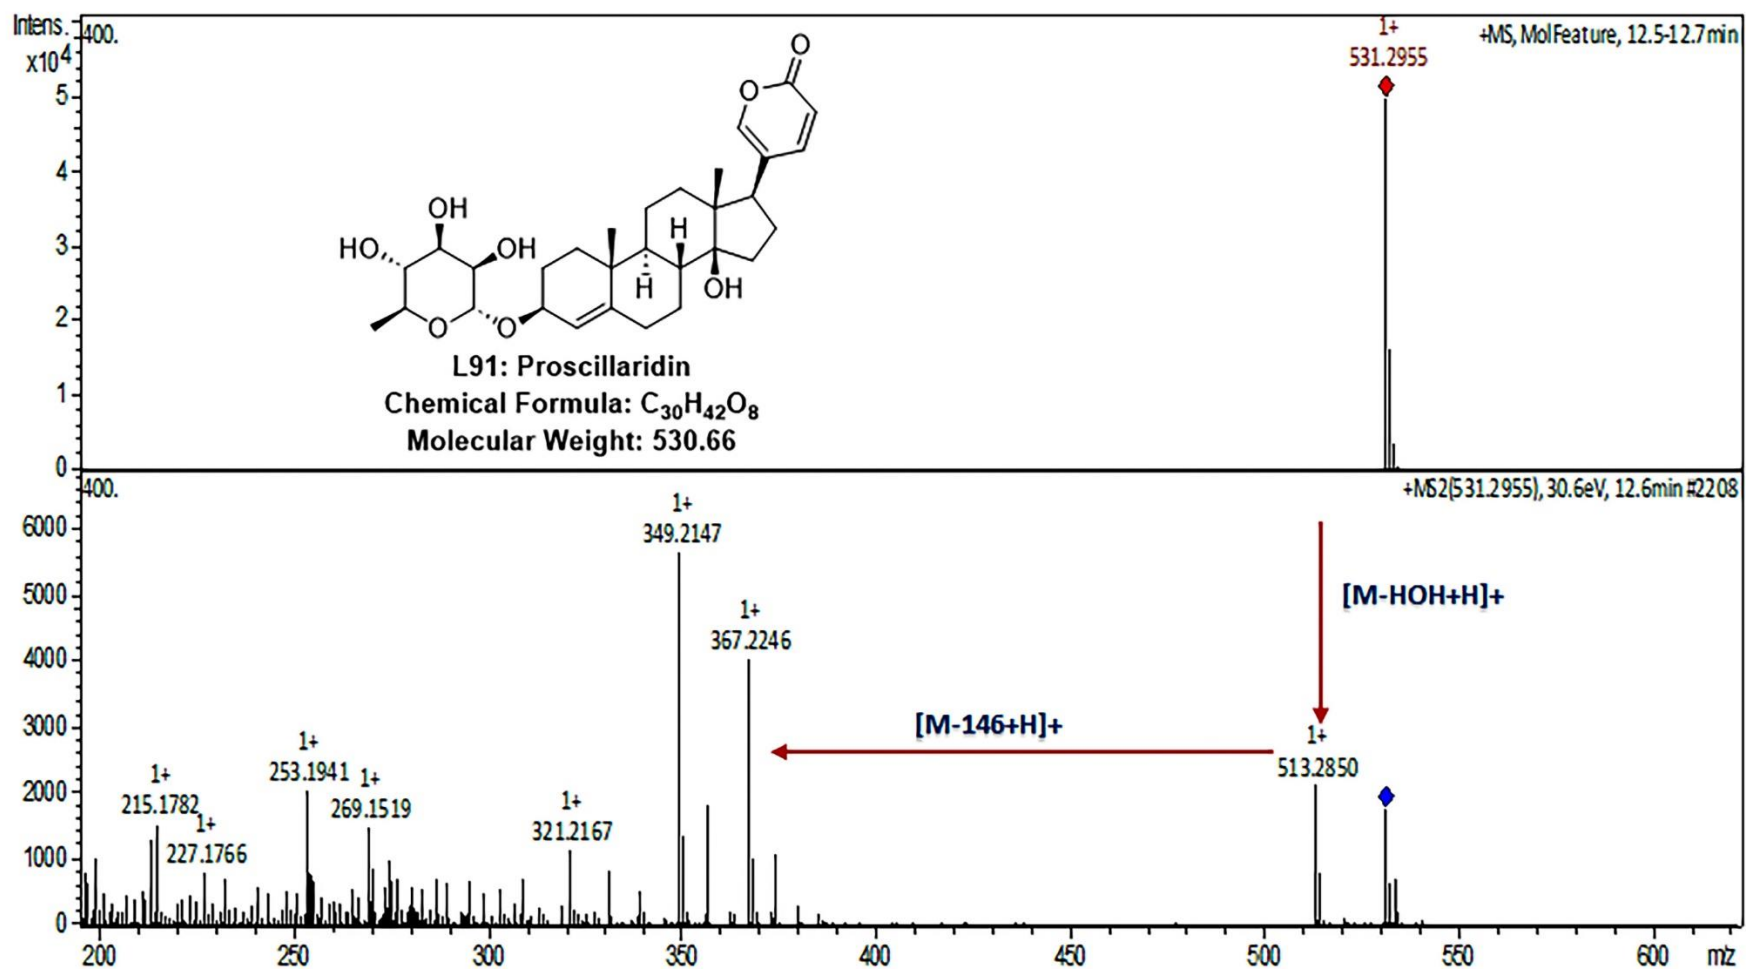

**Figure S1.-E:** ESI-MS/MS spectrum of L91 in the positive ion mode.

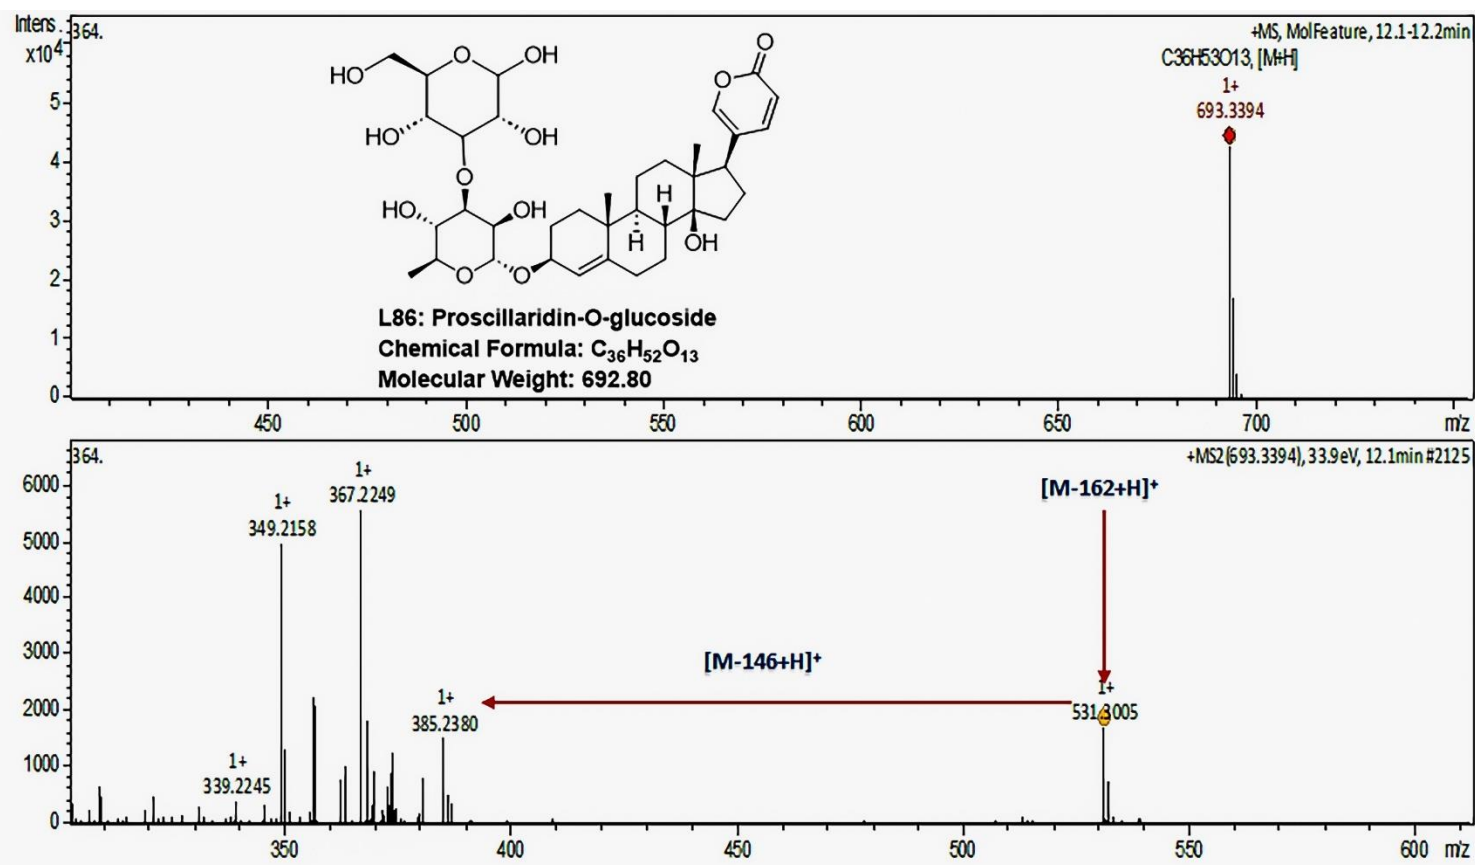

**Figure S1.-F:** ESI-MS/MS spectrum of L86 in the positive ion mode.



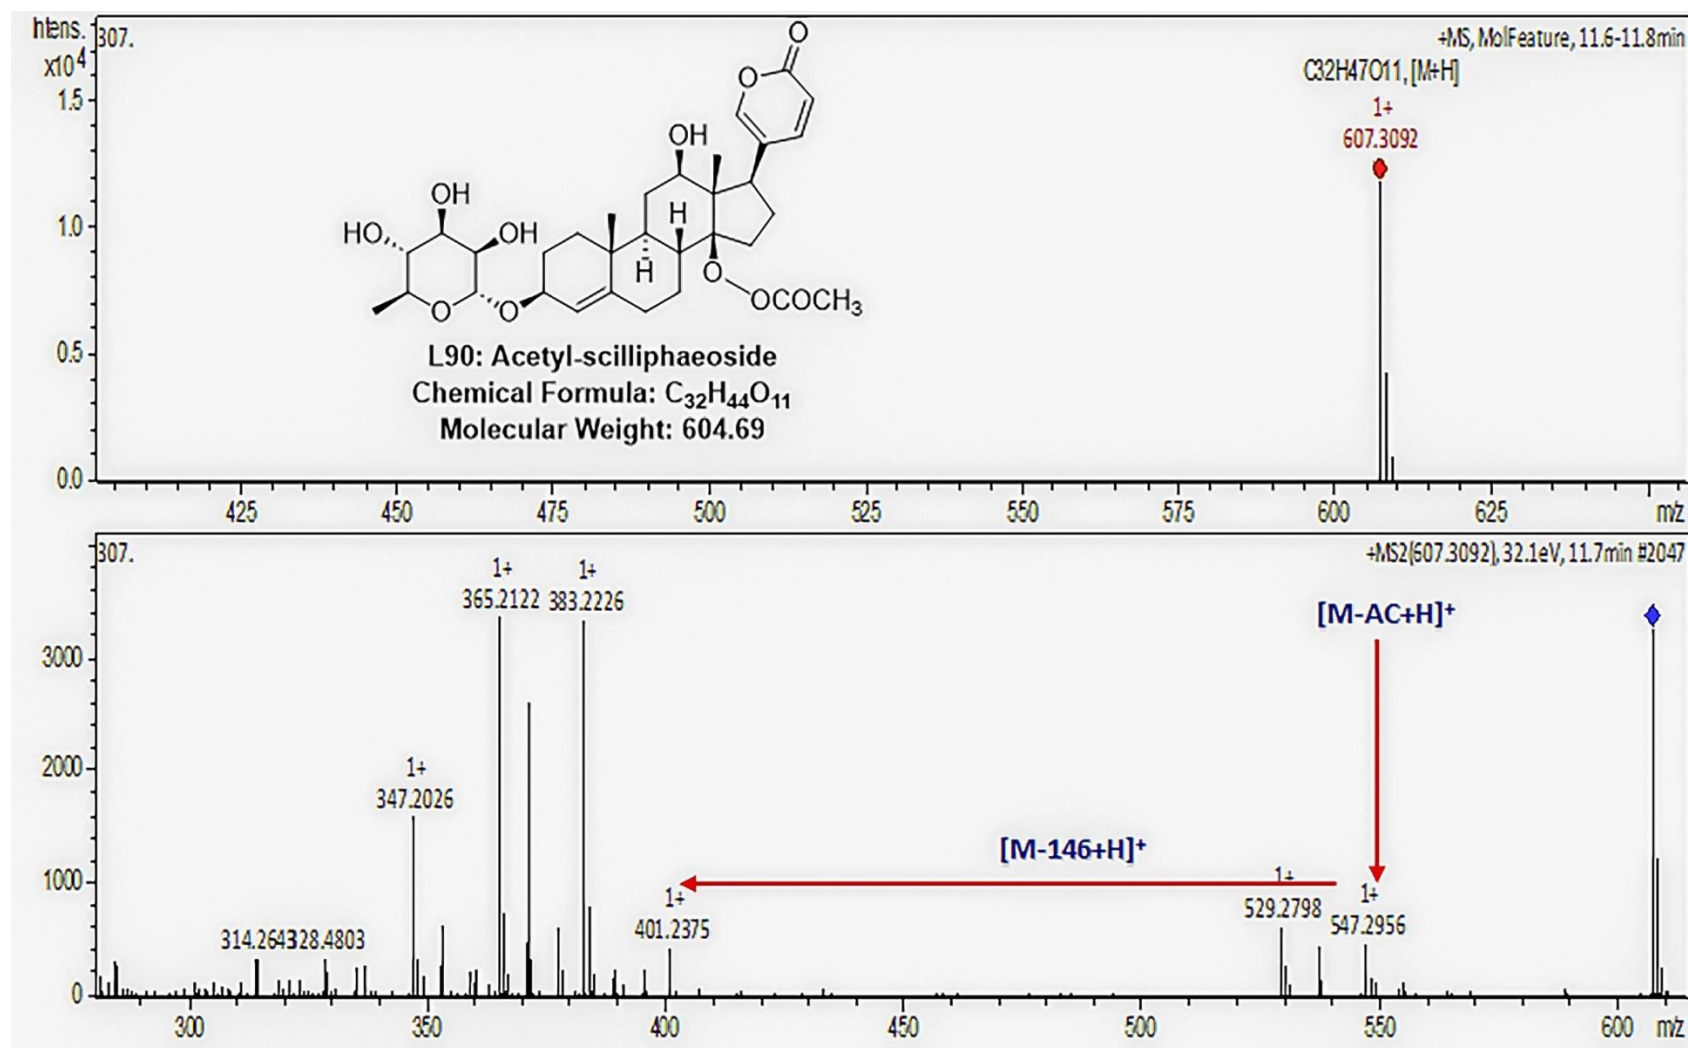

**Figure S1.-G:** ESI-MS/MS spectrum of L90 in the positive ion mode.

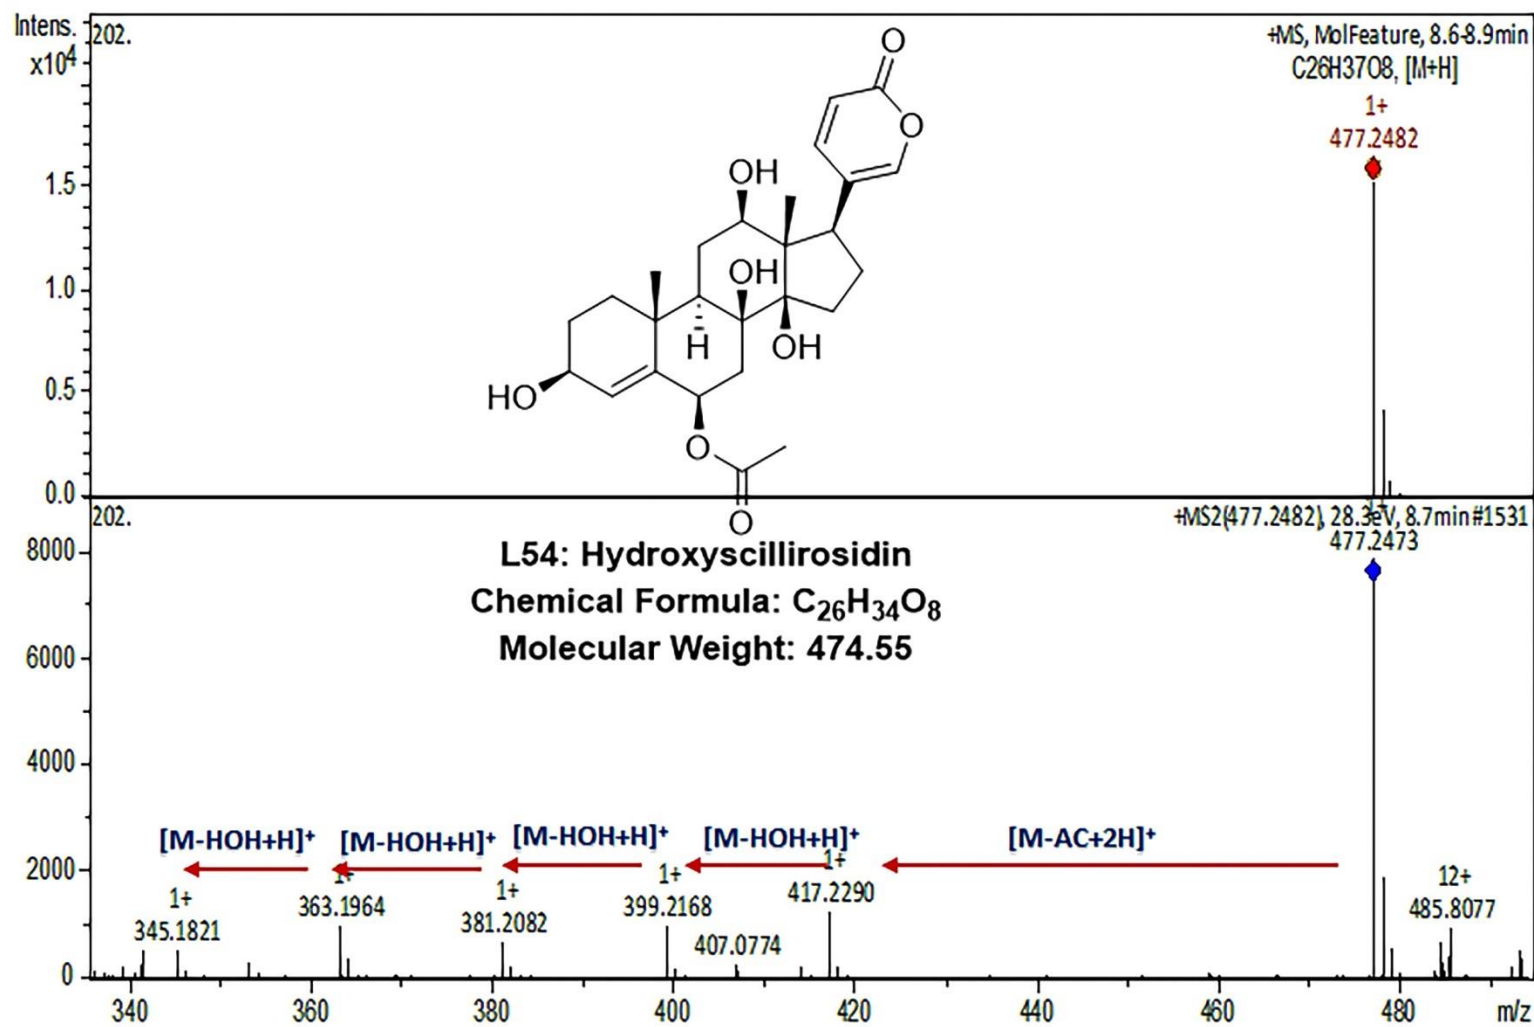

**Figure S1.-H:** ESI-MS/MS spectrum of L54 in the positive ion mode.

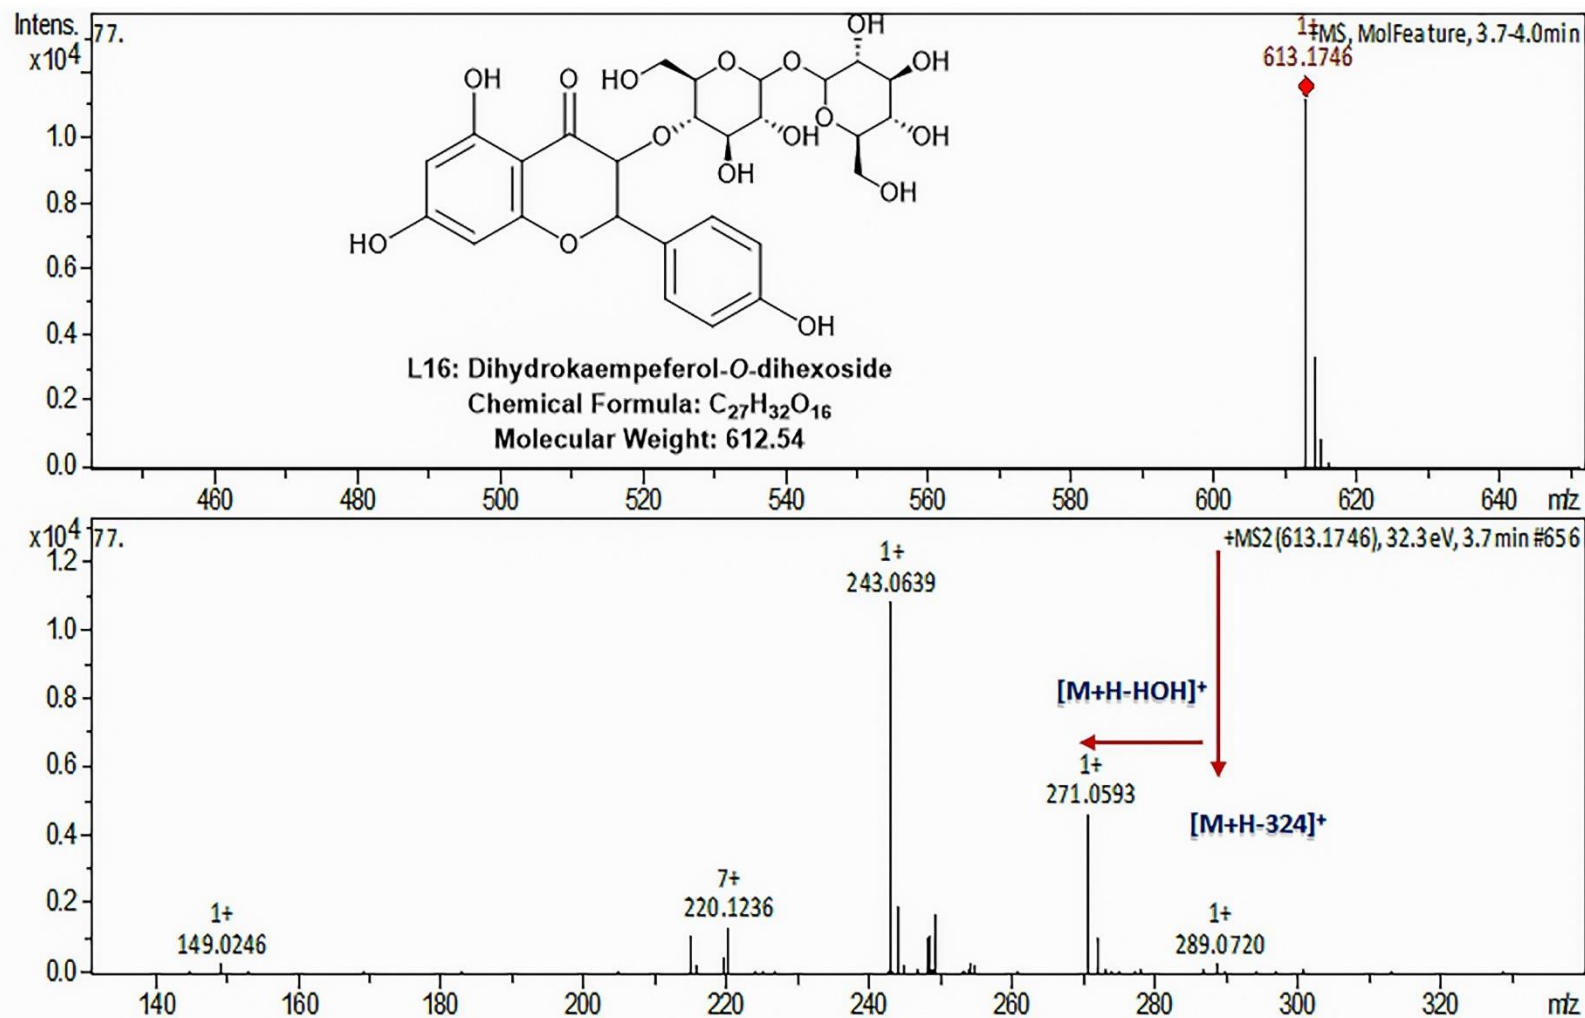

**Figure S1.-I:** ESI-MS/MS spectrum of L16 in the positive ion mode.

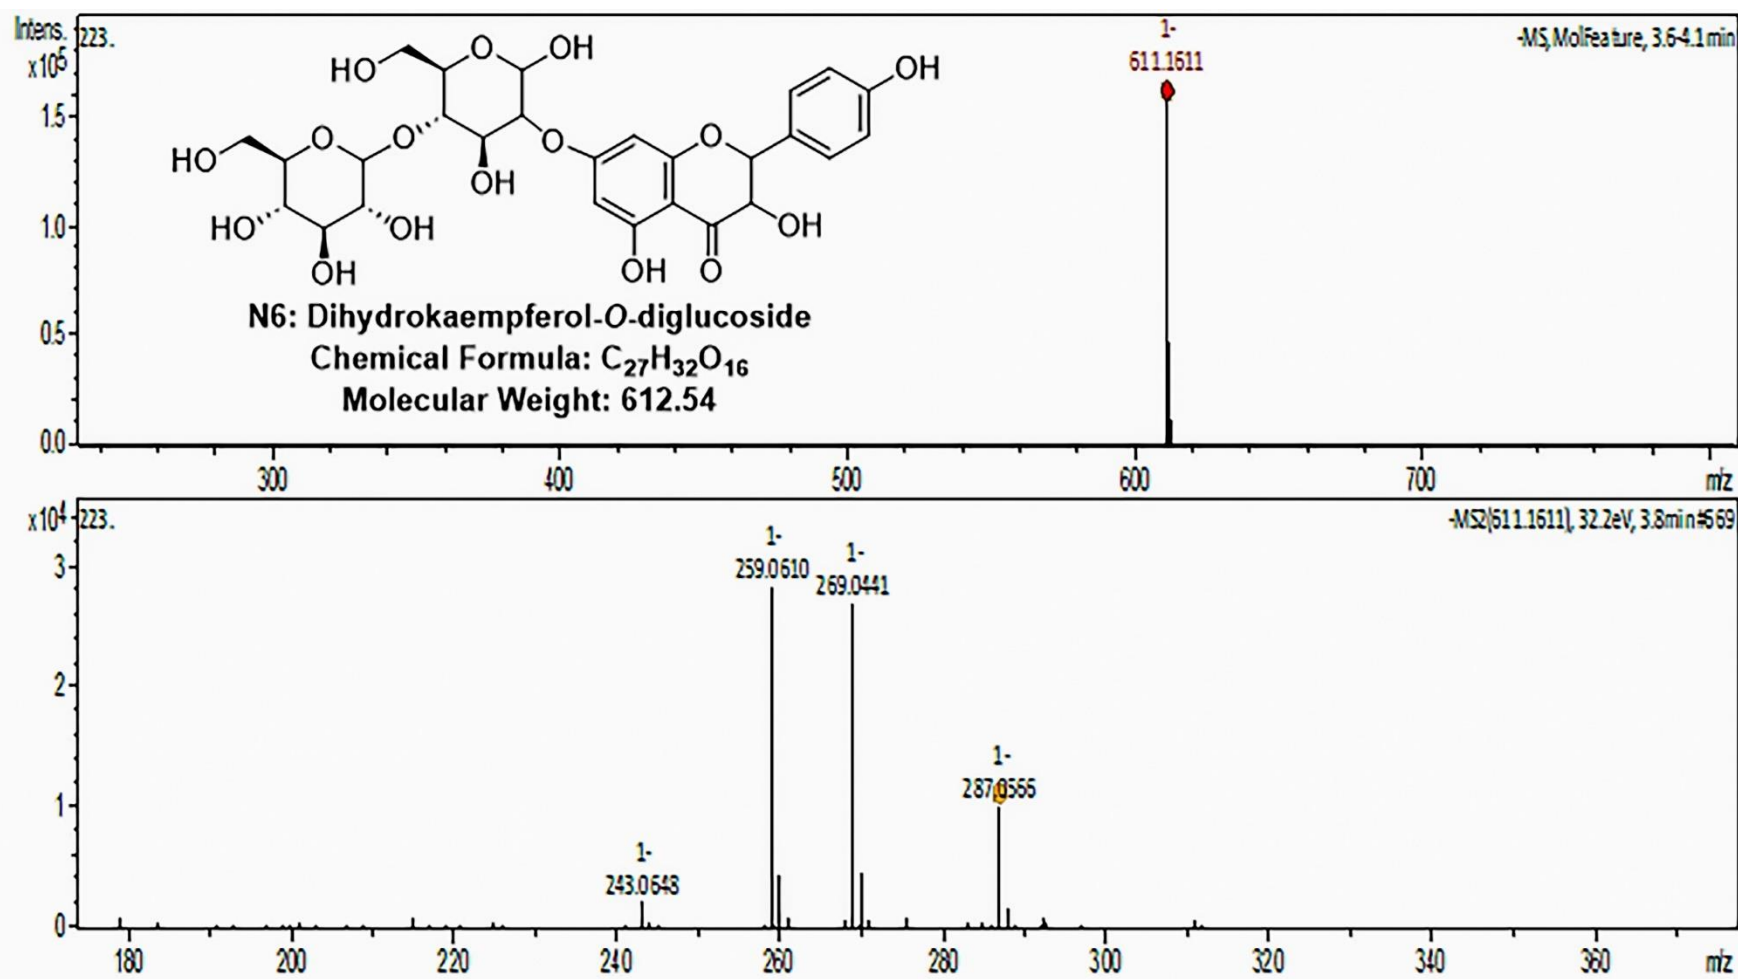

**Figure S1.-J:** ESI-MS/MS spectrum of N6 in the negative ion mode.

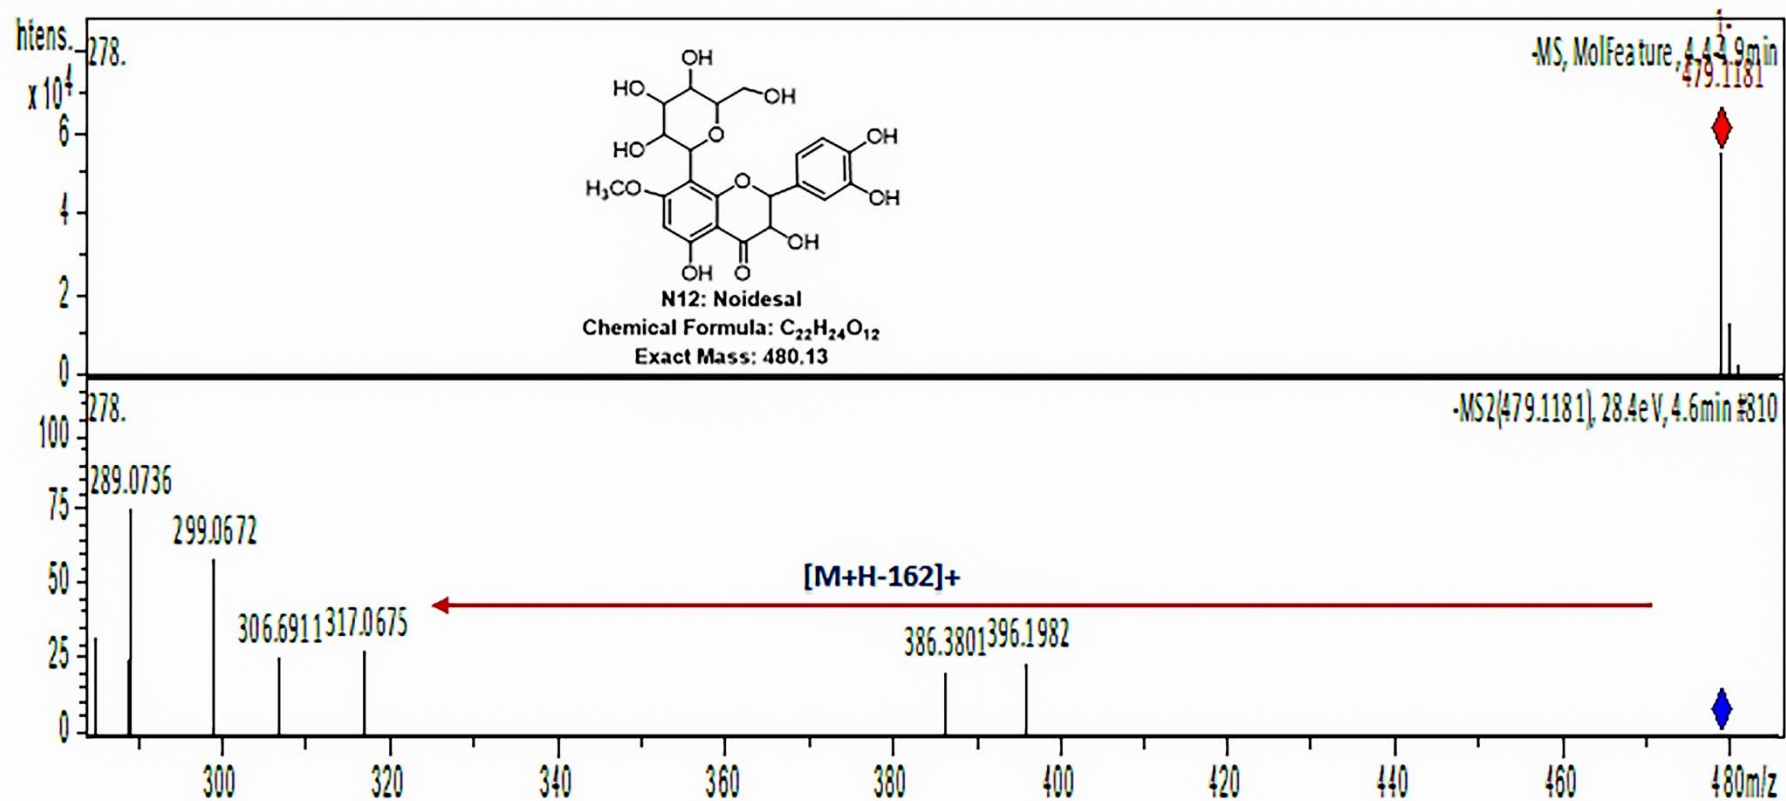

**Figure S1.-K:** ESI-MS/MS spectrum of N12 in the negative ion mode.

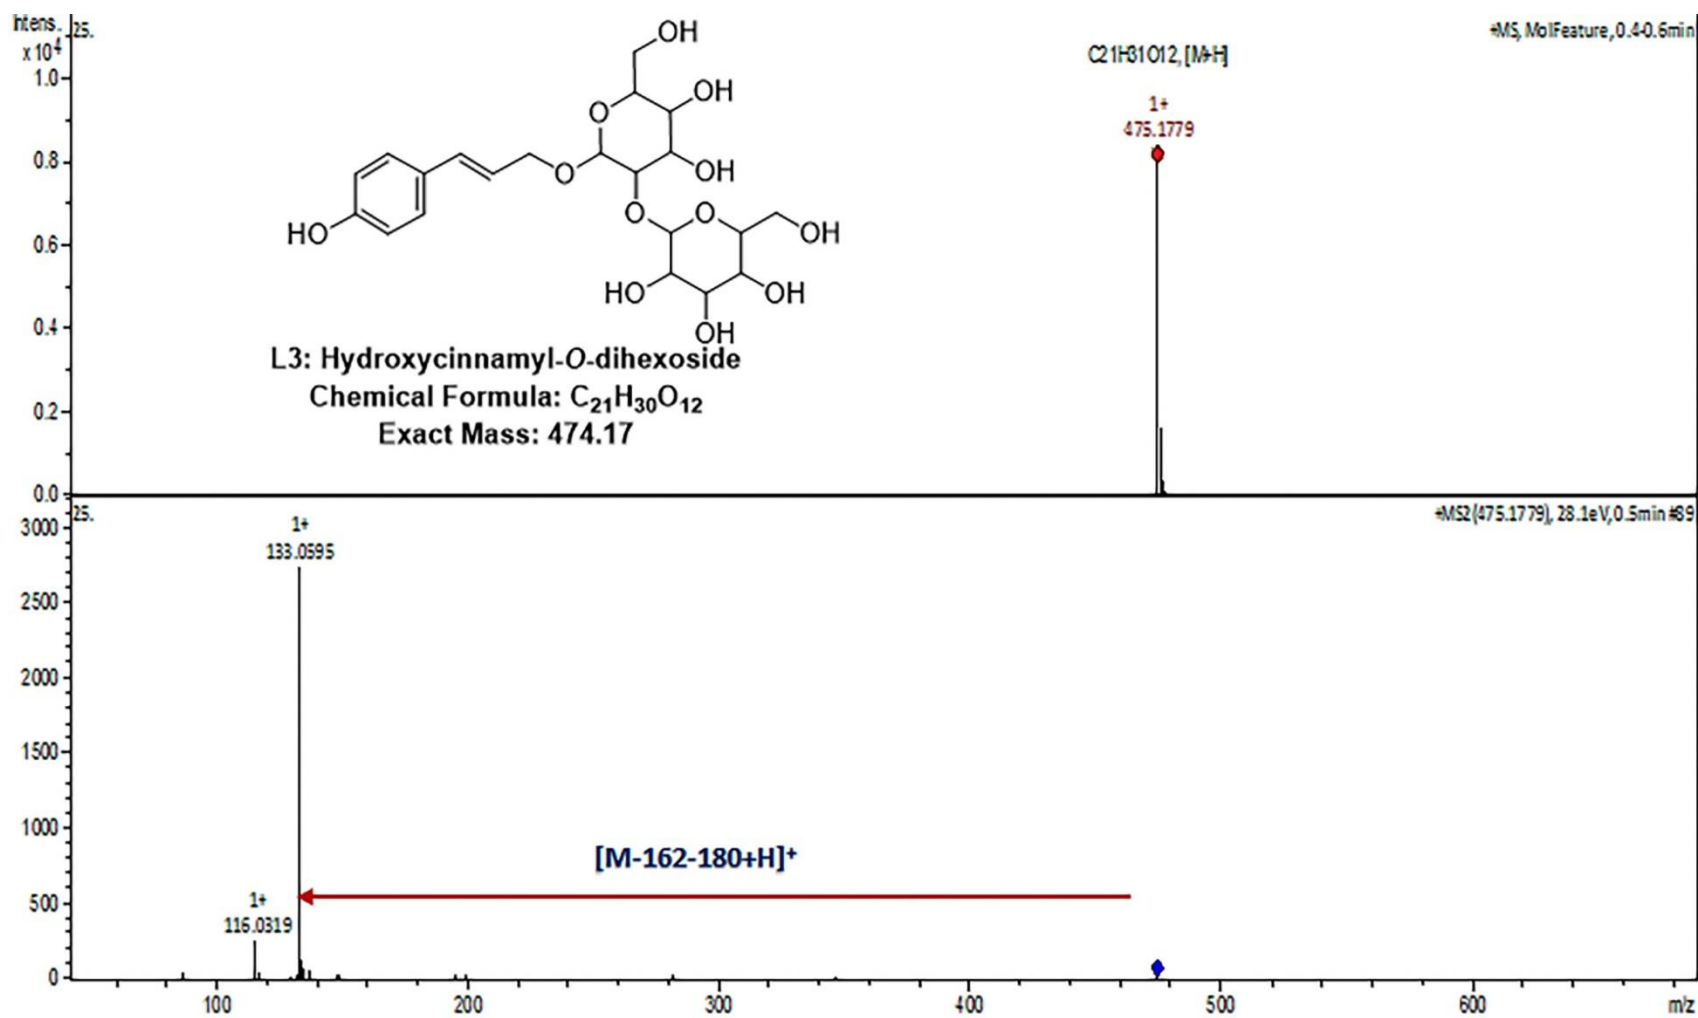

**Figure S1.-L:** ESI-MS/MS spectrum of L3 in the positive ion mode.

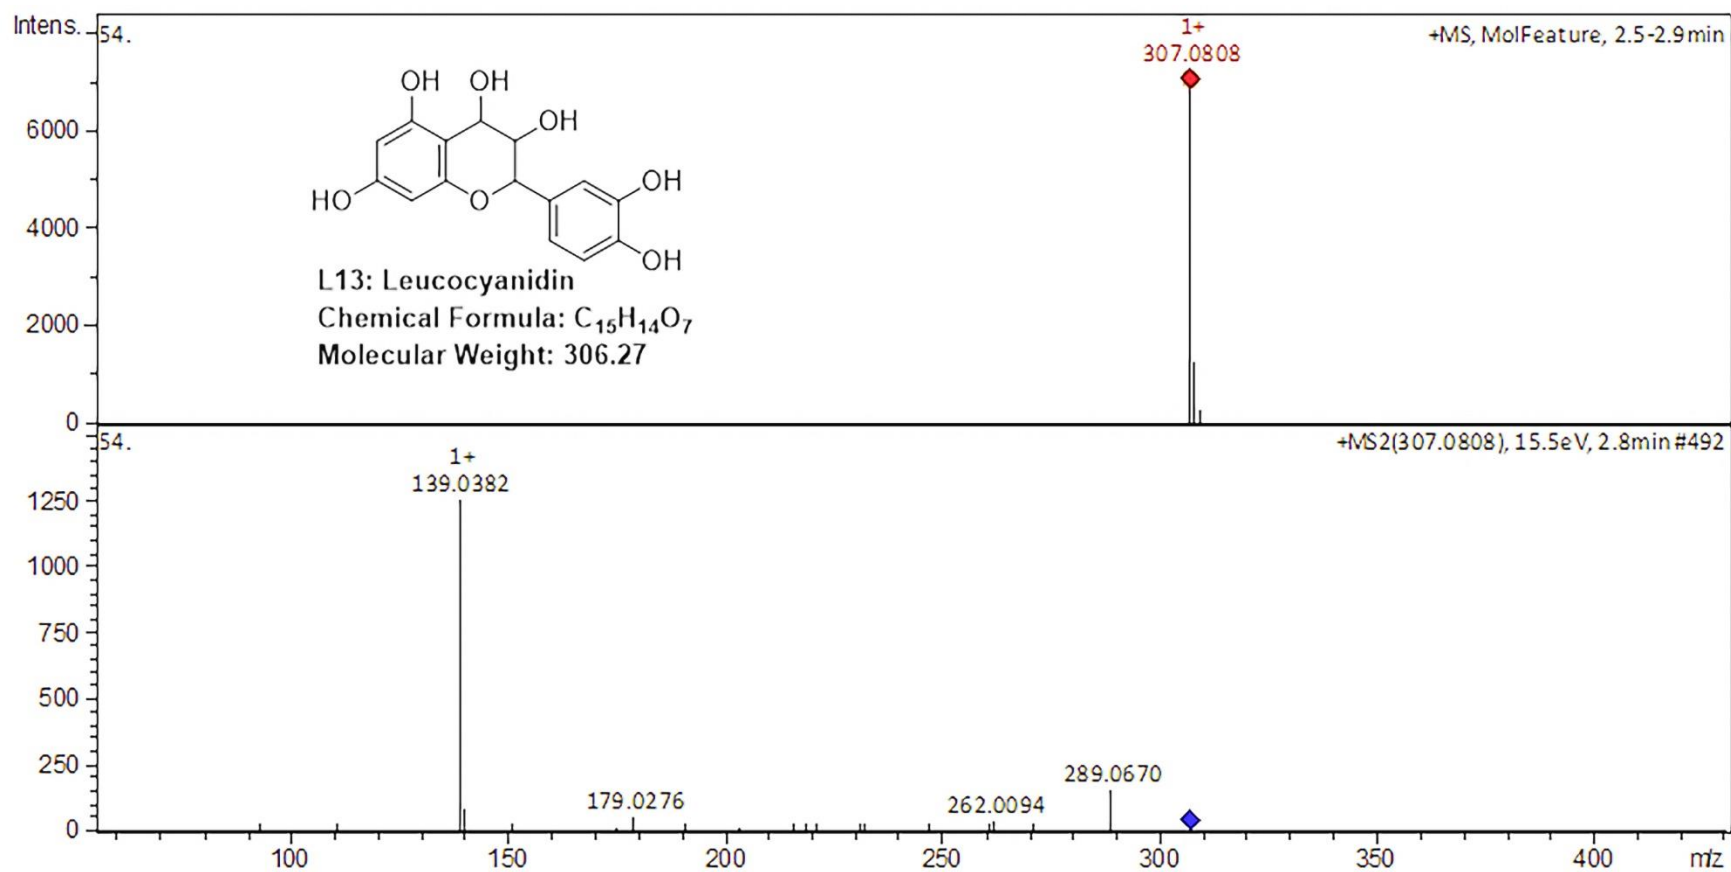

**Figure S1.-M:** ESI-MS/MS spectrum of L13 in the positive ion mode.

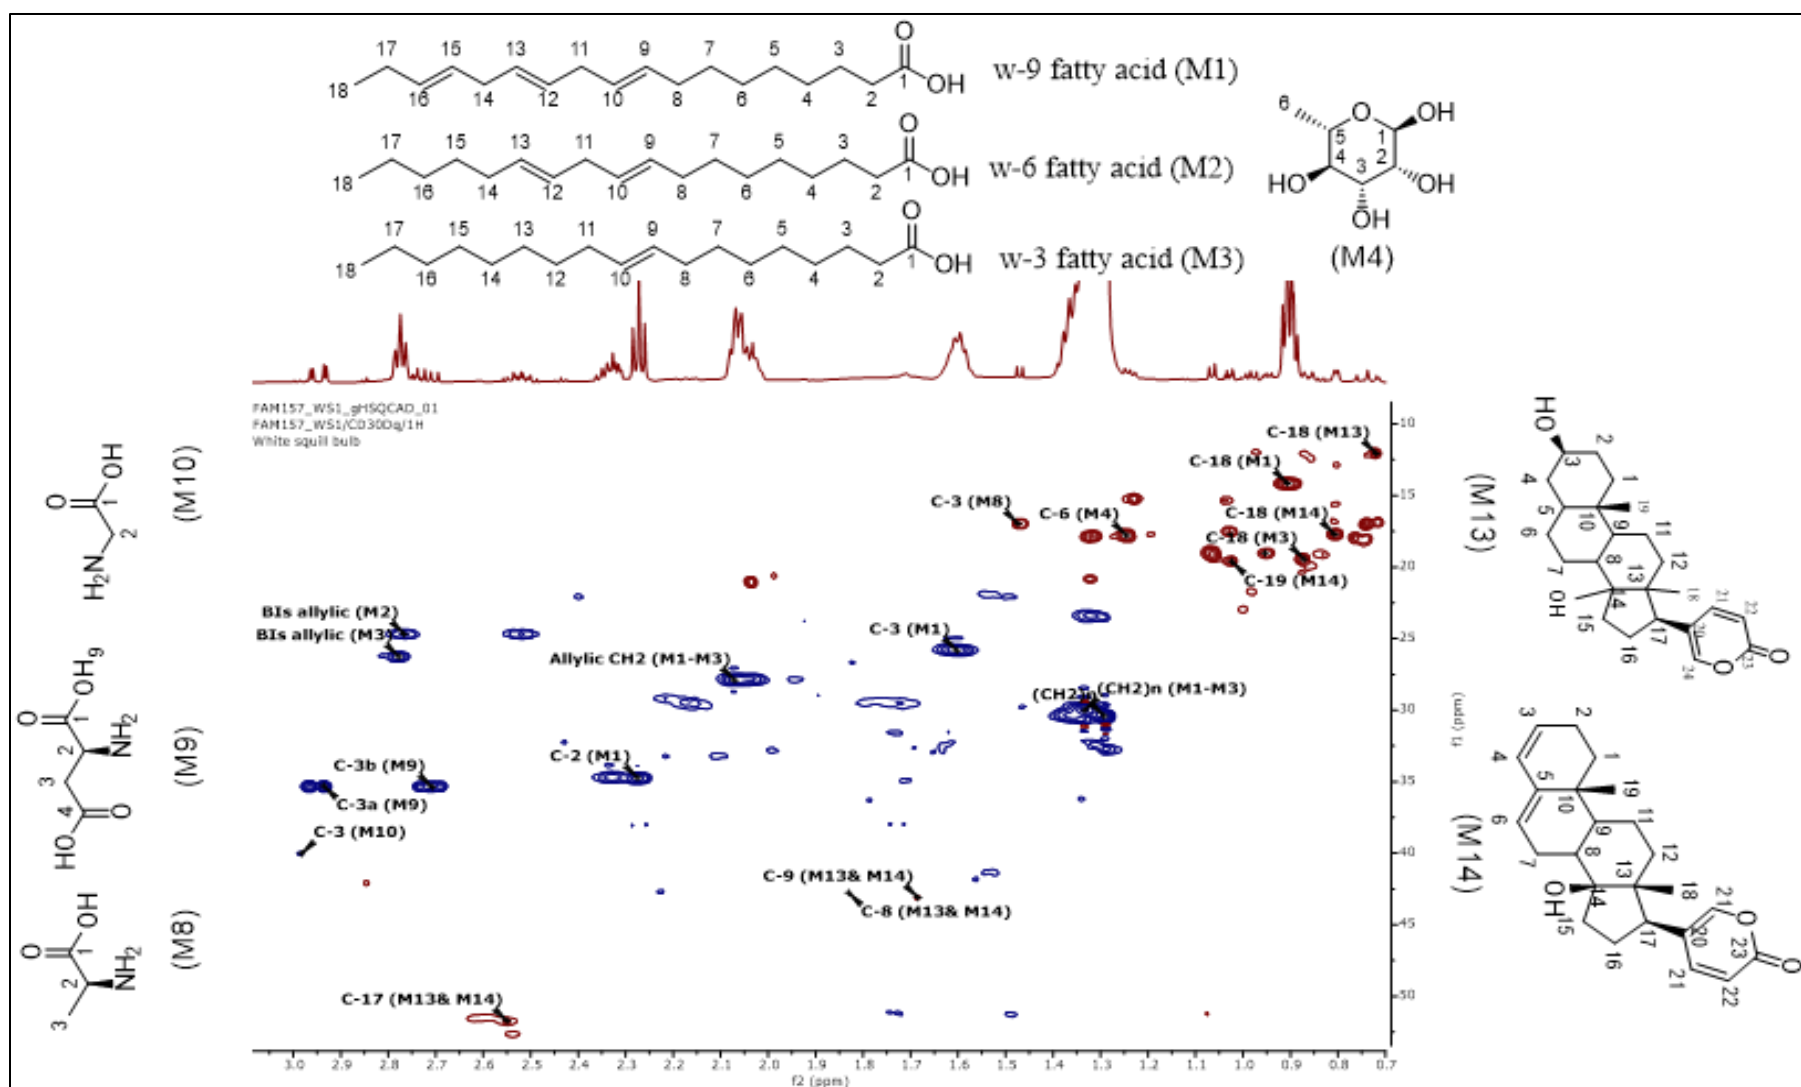

**Figure S2.** Signal assignment of the  $^1\text{H}$ -NMR markers for fatty acids (M1-M3), rhamnose (M4), alanine (M8), aspartic acid (M9), glycine (M10) and bufadienolides (M13&M14) using  $^1\text{H}$ - $^{13}\text{C}$  correlations observed in the HSQC spectrum of squill methanol extract.



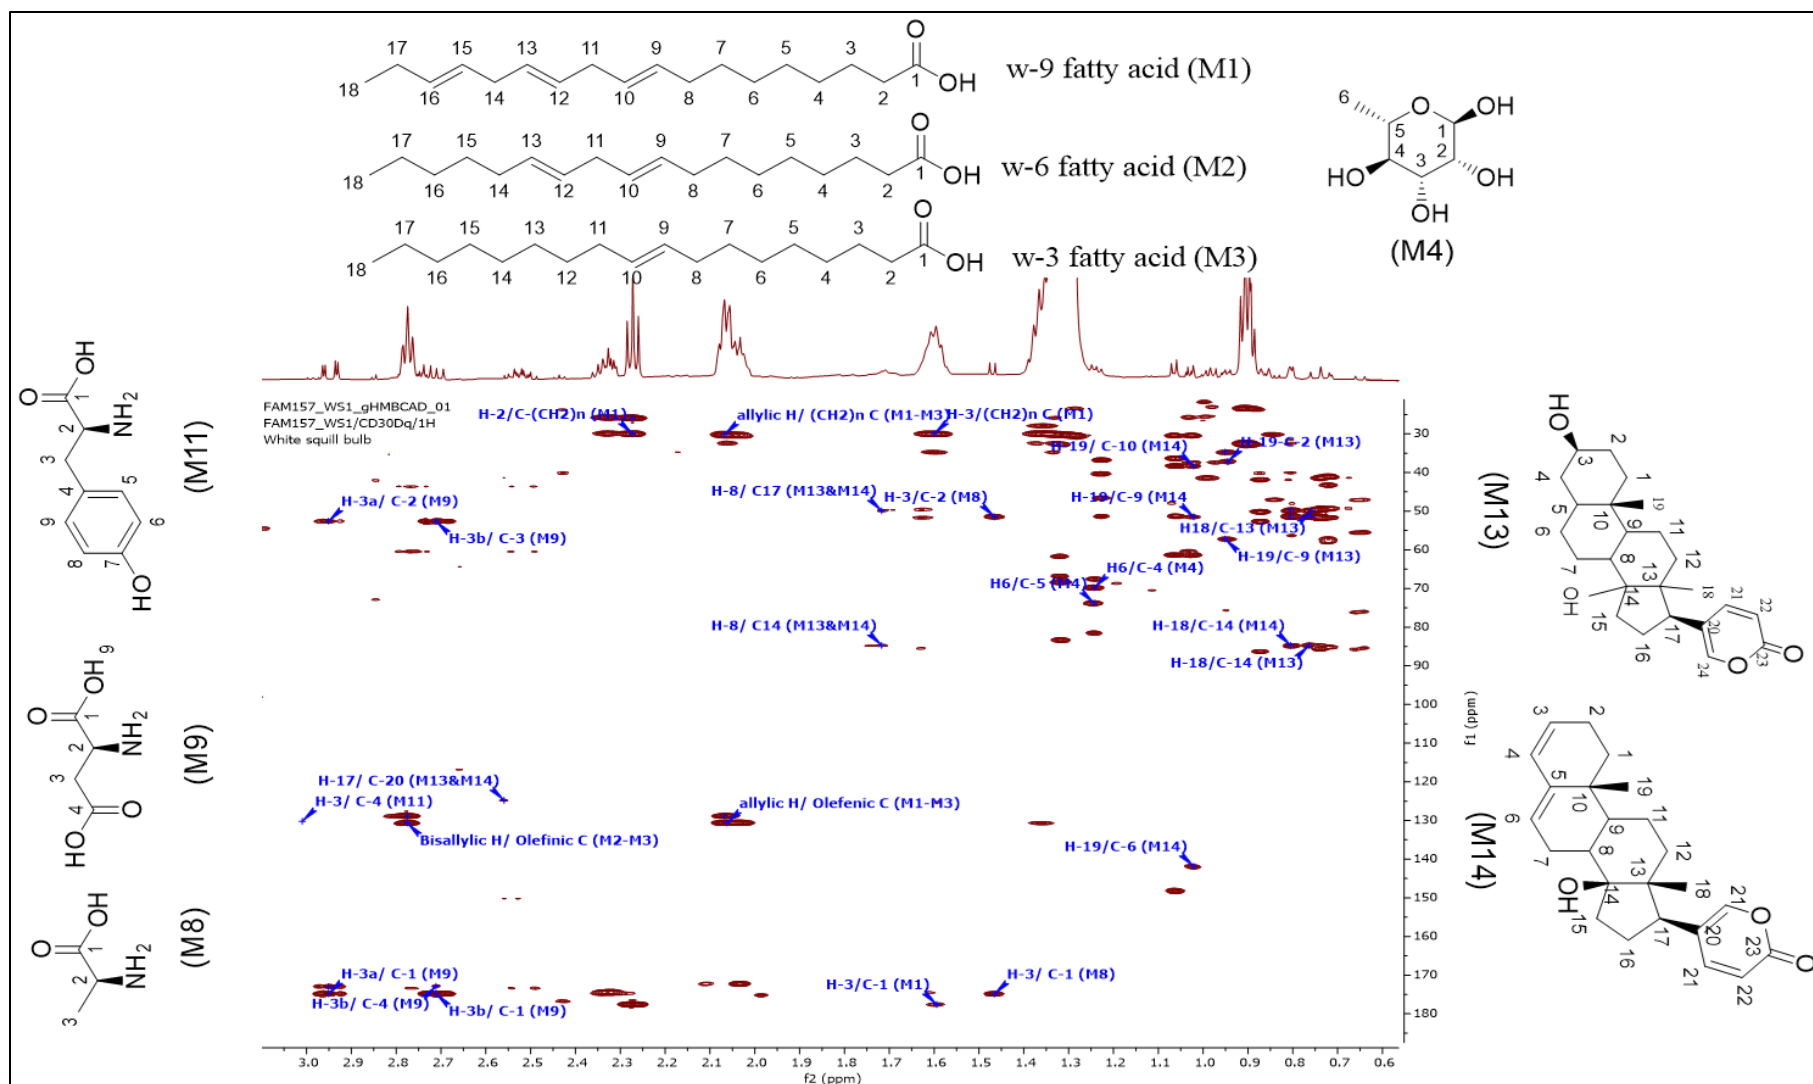

**Figure S3.** Signal assignment of the  $^1\text{H}$ -NMR markers for fatty acids (**M1-M3**), rhamnose (**M4**), alanine (**M8**), aspartic acid (**M9**), glycine (**M10**) and bufadienolides (**M13&M14**) using  $^1\text{H}$ - $^{13}\text{C}$  correlations observed in the HMBC spectrum of squill methanol extract.

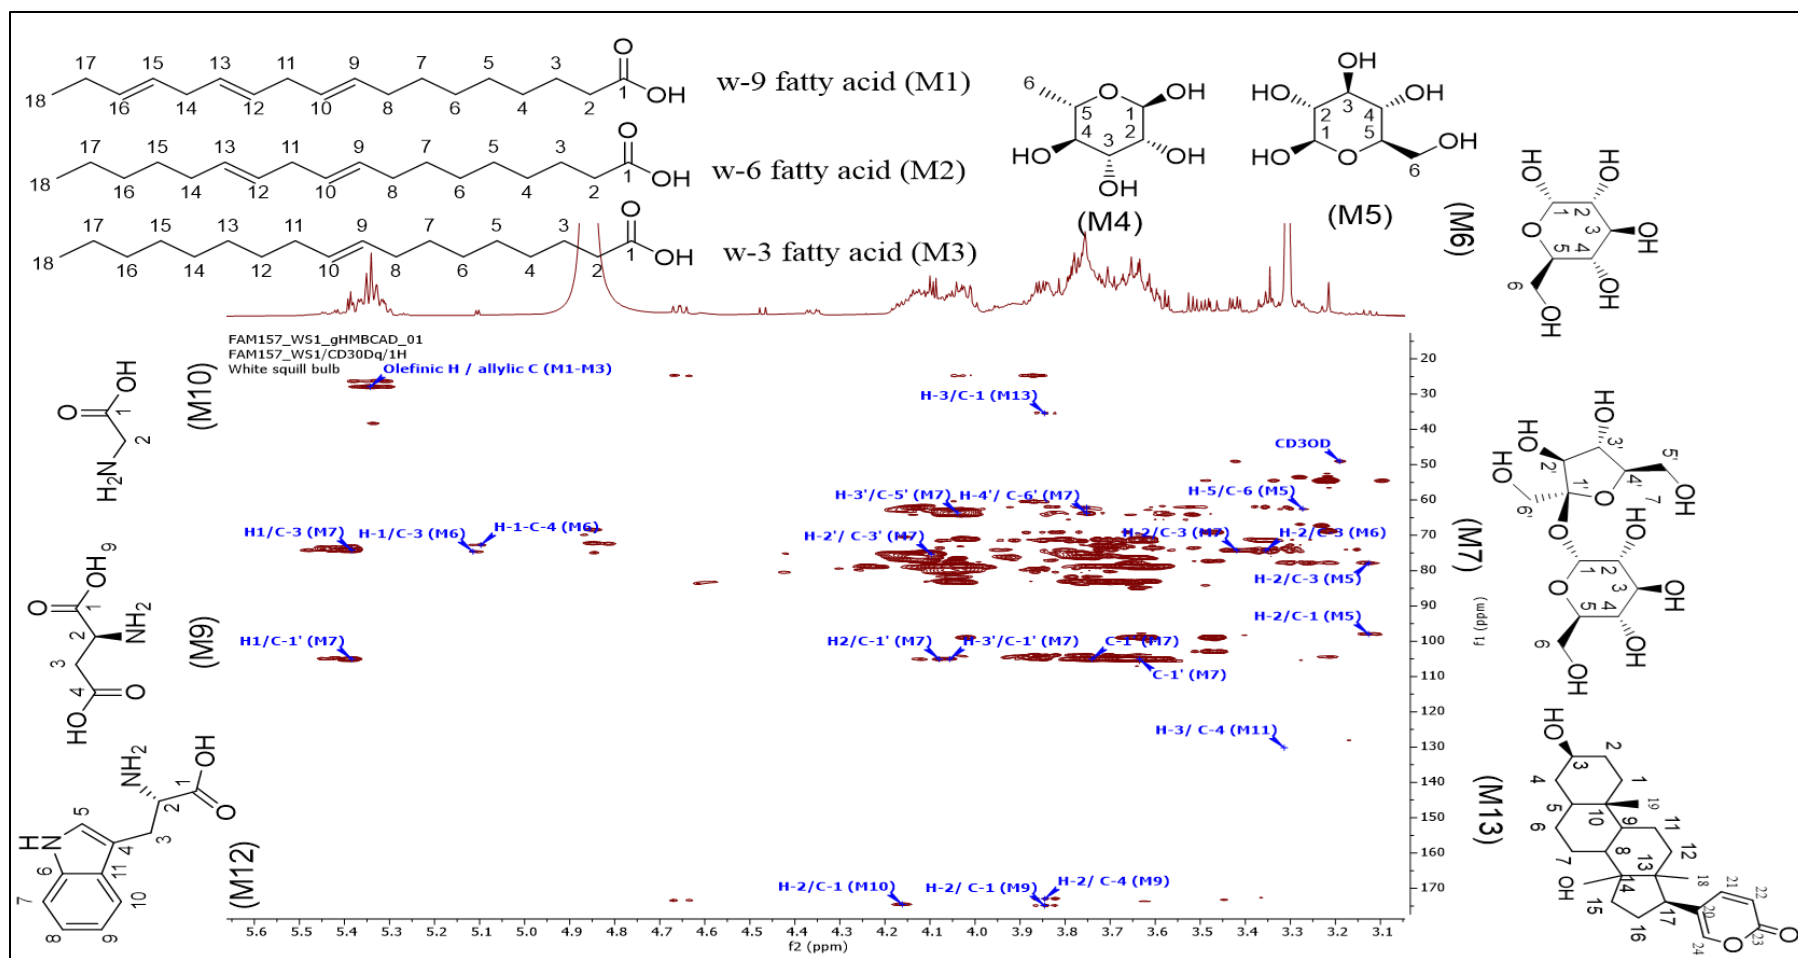

**Figure S4.** Signal assignment of the  $^1\text{H}$ -NMR markers for fatty acids (M1-M3), rhamnose (M4),  $\beta$ ,  $\alpha$  glucose (M5& M6), sucrose (M7), aspartic acid (M9), glycine (M10), tryptophan (M12) and bufalin (M13) using  $^1\text{H}$ - $^{13}\text{C}$  correlations observed in the HMBC spectrum of squill methanol extract.

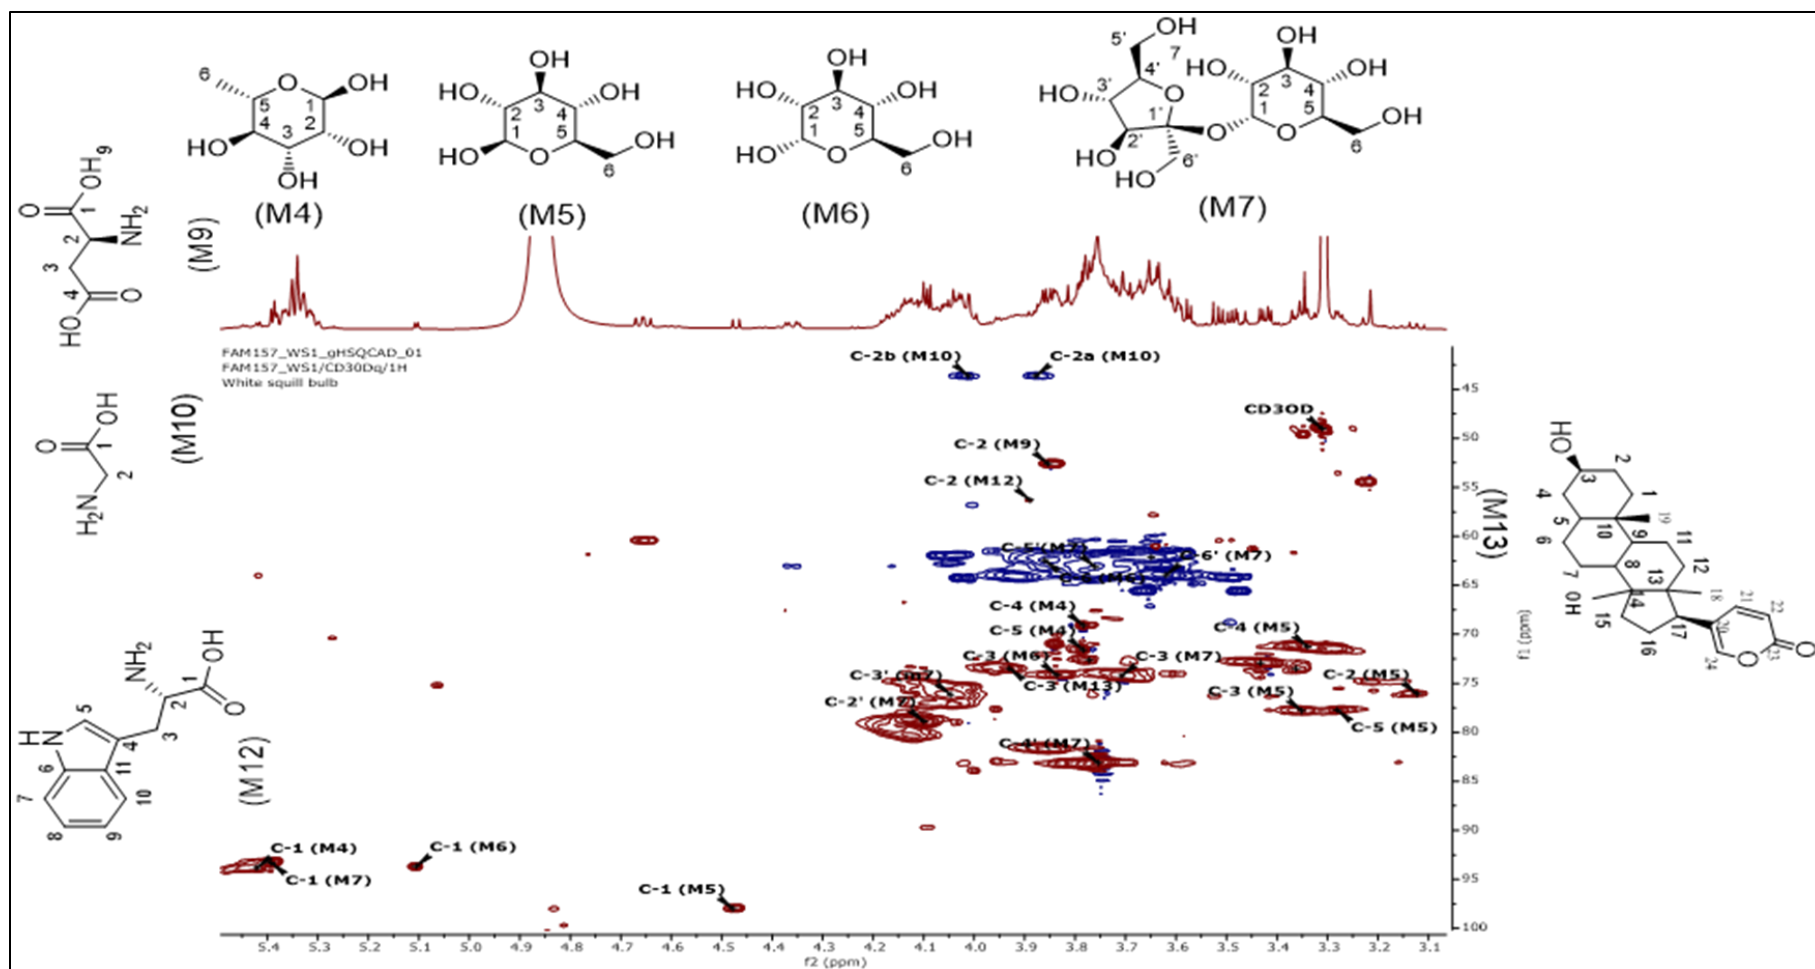

**Figure S5.** Signal assignment of the  $^1\text{H}$ -NMR markers for rhamnose (M4),  $\beta$ ,  $\alpha$  glucose (M5 & M6), sucrose (M7), aspartic acid (M9), glycine (M10), tryptophan (M12) and bufalin (M13) using  $^1\text{H}$ - $^{13}\text{C}$  correlations observed in the HSQC spectrum of squill methanol extract.

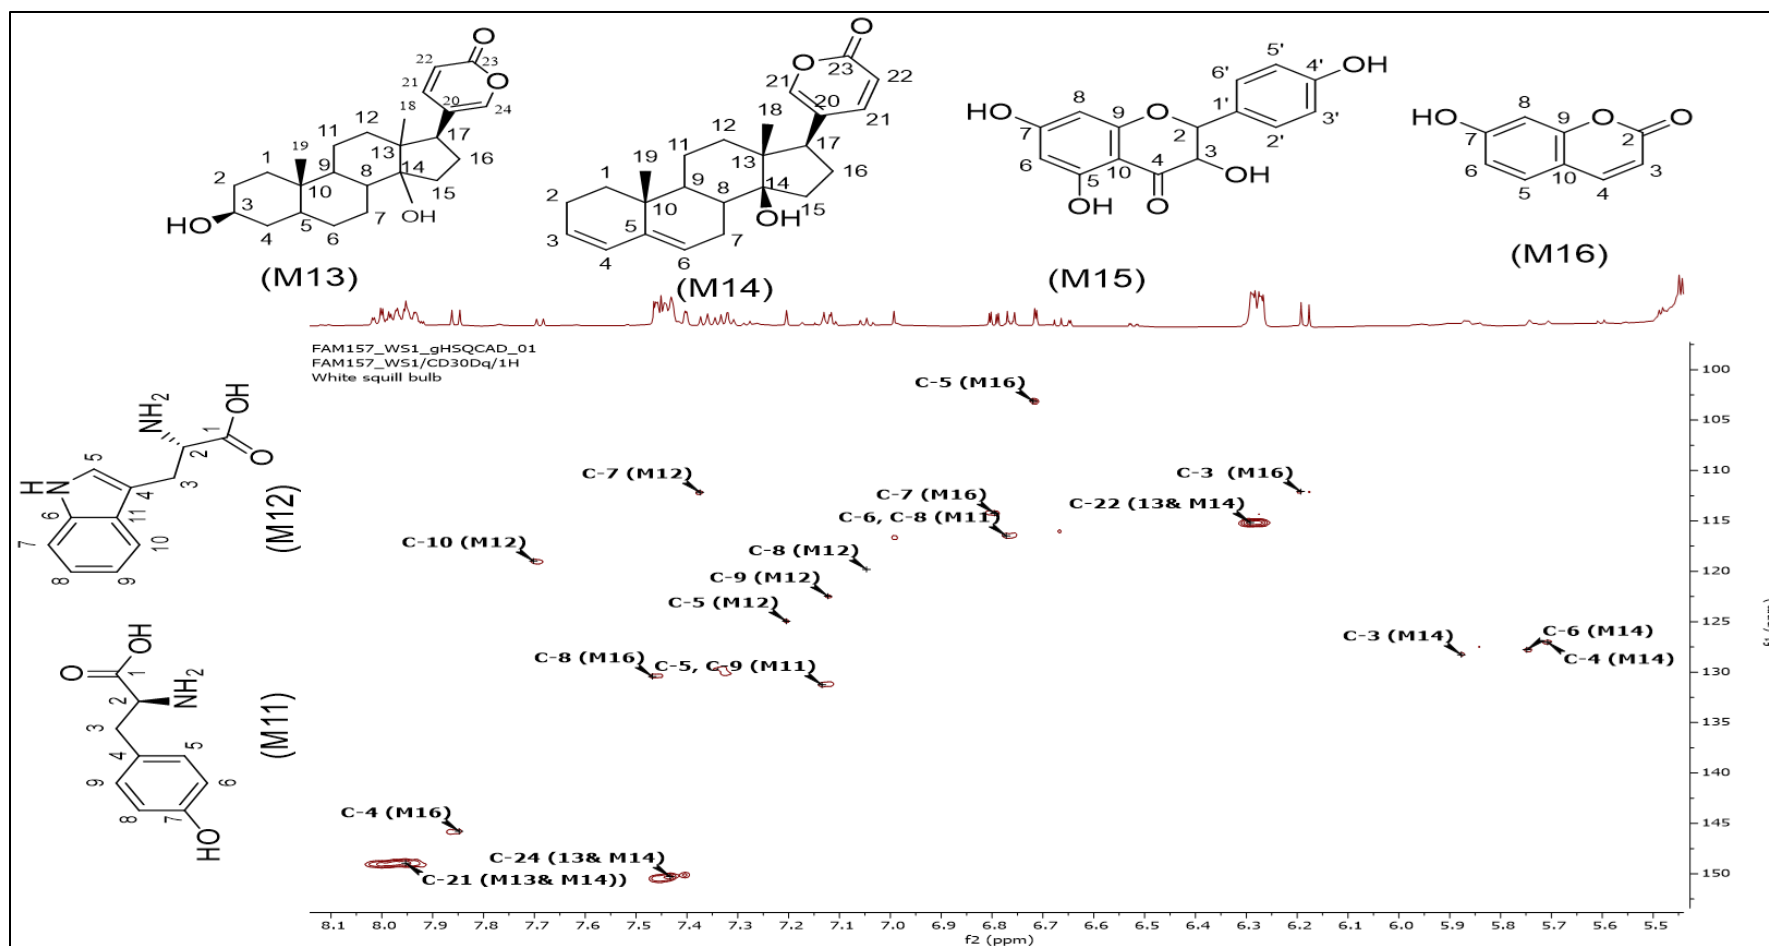

**Figure S6:** Signal assignment of the  $^1\text{H}$ -NMR markers for tyrosine (**M11**), tryptophan (**M12**), bufalin (**M13**), scilliridin (**M14**), dihydrokaempferol (**M15**), and coumarin (**M16**),  $^1\text{H}$ - $^{13}\text{C}$  correlations observed in the HSQC spectrum of squill methanol extract.

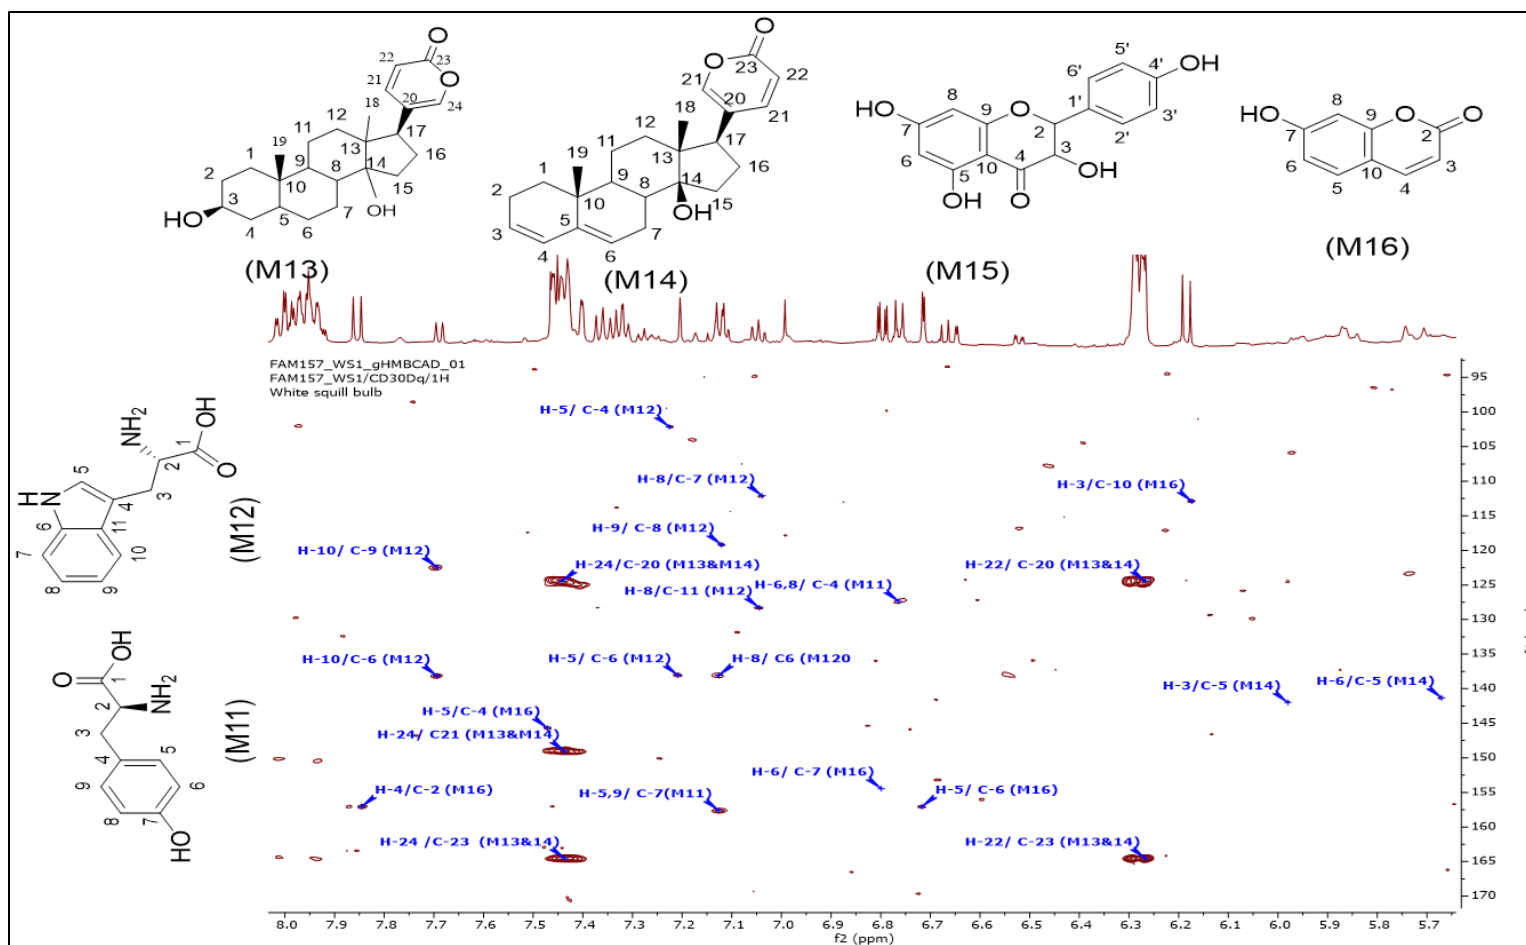

**Figure S7.** Signal assignment of the  $^1\text{H}$ -NMR markers for tyrosine (M11), tryptophan (M12), bufalin (M13), scilliridin (M14), dihydro kaempferol (M15), and coumarin (M16),  $^1\text{H}$ - $^{13}\text{C}$  correlations observed in the HMBC spectrum of squill methanol extract.

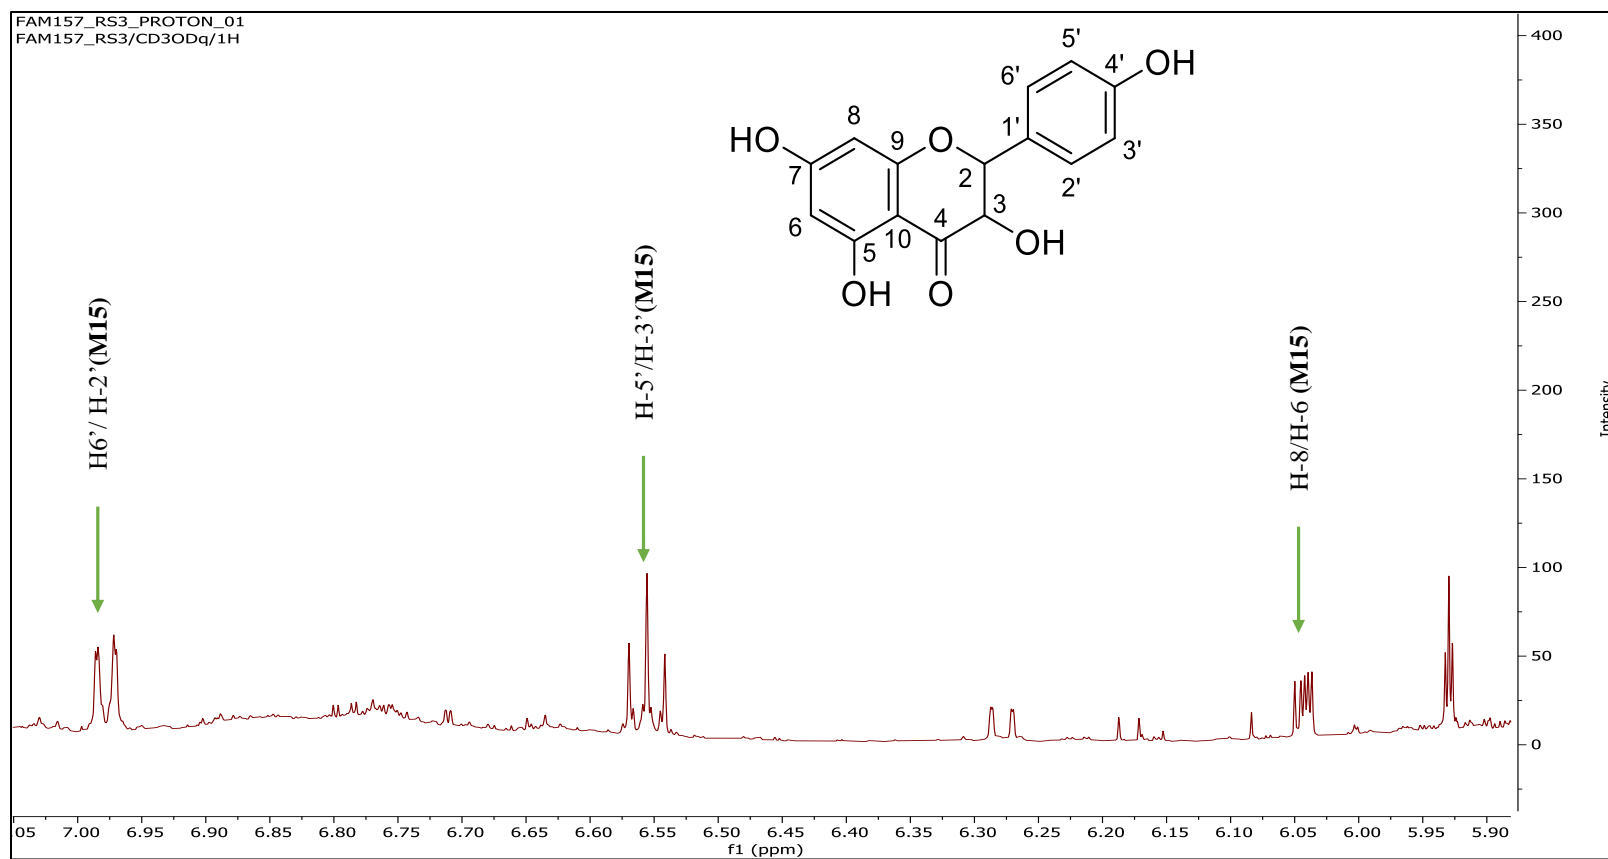

**Figure S8.** Signal assignment of the proton markers for dihydro kaempferol (**M15**) observed in the  $^1\text{H}$ -NMR spectrum of RS methanol extract.
